# Supplementary material
Source: ML conference proceedings conference paper supplement (https://openreview.net/forum?id=4qG2RKuZaA)
Supplement: supplementary_material [file attachment]

---

# Censored Sampling of Diffusion Models Using 3 Minutes of Human Feedback

---

Anonymous Author(s)

Affiliation

Address

email

## Abstract

1        Diffusion models have recently shown remarkable success in high-quality image  
2        generation. Sometimes, however, a pre-trained diffusion model exhibits partial mis-  
3        alignment in the sense that the model can generate good images, but it sometimes  
4        outputs undesirable images. If so, we simply need to prevent the generation of the  
5        bad images, and we call this task censoring. In this work, we present censored  
6        generation with a pre-trained diffusion model using a reward model trained on  
7        minimal human feedback. We show that censoring can be accomplished with  
8        extreme human feedback efficiency and that labels generated with a mere few  
9        minutes of human feedback are sufficient.

## 10    1 Introduction

11    Diffusion probabilistic models [19, 12, 42] have recently shown remarkable success in high-quality  
12    image generation. Much of the progress is driven by scale [35, 36, 38], and this progression points  
13    to a future of spending high costs to train a small number of large-scale foundation models [4] and  
14    deploying them, sometimes with fine-tuning, in various applications. In particular use cases, however,  
15    such pre-trained diffusion models may be misaligned with goals specified before or after the training  
16    process. An example of the former is text-guided diffusion models occasionally generating content  
17    with nudity despite the text prompt containing no such request. An example scenario of the latter is  
18    deciding that generated images should not contain a certain type of concepts (for example, human  
19    faces) even though the model was pre-trained on images with such concepts.

20    Fixing misalignment directly through training may require an impractical cost of compute and data.  
21    To train a large diffusion model again from scratch requires compute costs of up to hundreds of  
22    thousands of USD [30, 29]. To fine-tune a large diffusion model requires data size ranging from  
23    1,000 [28] to 27,000 [25].<sup>1</sup> We argue that such costly measures are unnecessary when the pre-trained  
24    model is already capable of sometimes generating “good” images. If so, we simply need to prevent  
25    the generation of “bad” images, and we call this task *censoring*. (Notably, censoring does not aim  
26    to improve the “good” images.) Motivated by the success of reinforcement learning with human  
27    feedback (RLHF) in language domains [9, 49, 43, 33], we perform censoring using human feedback.

28    In this work, we present censored generation with a pre-trained diffusion model using a reward model  
29    trained on extremely limited human feedback. Instead of fine-tuning the pre-trained diffusion model,  
30    we train a reward model on labels generated with a **few minutes of human feedback** and perform  
31    guided generation. By not fine-tuning the diffusion model (score network), we reduce both compute  
32    and data requirements for censored generation to negligible levels. (Negligible compared to any  
33    amount of compute and man-hours an ML scientist would realistically spend building a system with

---

<sup>1</sup>The prior work [28] fine-tunes a pre-trained diffusion model on a new dataset of size 1k using a so-called adapter module while [25] improves text-to-image alignment using 27k human-feedback data.

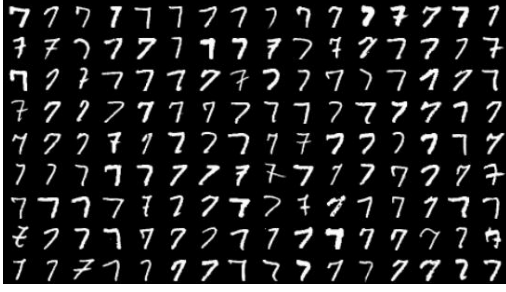

(a) Baseline: MNIST class “7”

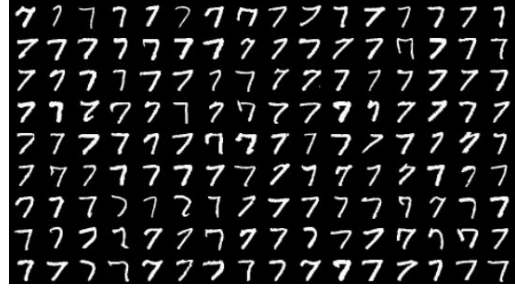

(b) Censored: Crossed 7

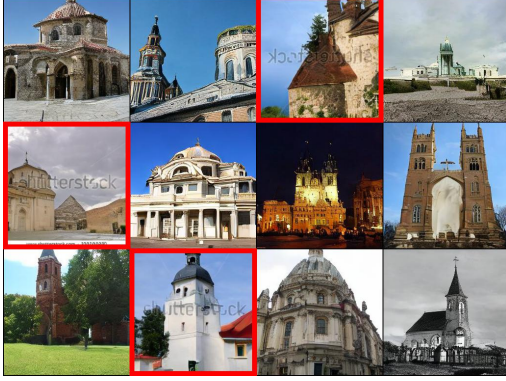

(c) Baseline: LSUN Church with LDM

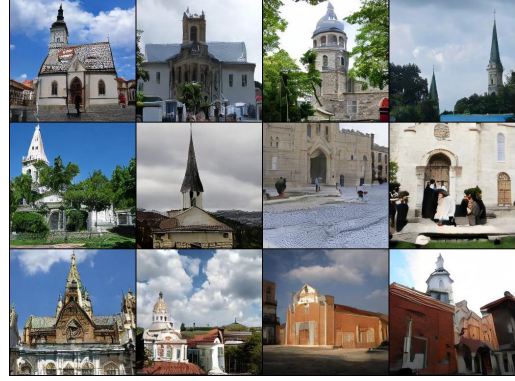

(d) Censored: Stock photo watermarks

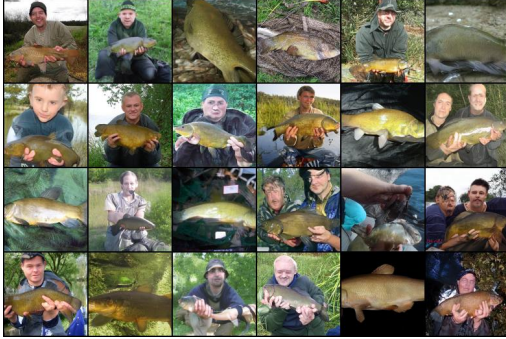

(e) Baseline: ImageNet class “tench” (fish)

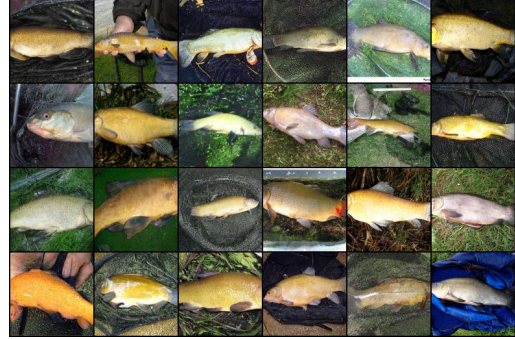

(f) Censored: Human faces

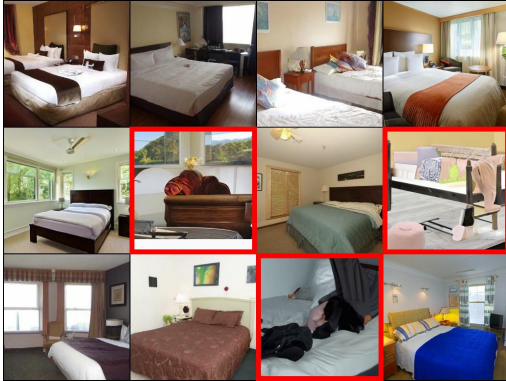

(g) Baseline: LSUN bedroom

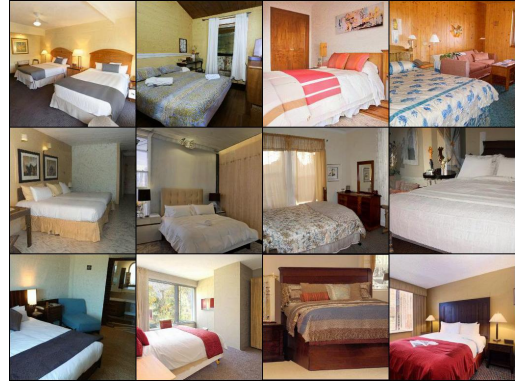

(h) Censored: Broken images

Figure 1: Uncensored baseline vs. censored generation. Setups are precisely defined in Section 5. Due to space constraints, we present selected representative images here. Full sets of non-selected samples are shown in the appendix.

a diffusion model.) We conduct experiments within multiple setups demonstrating how minimal human feedback enables removal of target concepts. The specific censoring targets we consider are: A handwriting variation (“crossed 7”s) in MNIST [11]; Watermarks in the LSUN [46] church images; Human faces in the ImageNet [10] class “tench”; “Broken” images in the generation of LSUN bedroom images.

**Contribution.** Most prior work focus on training new capabilities into diffusion models, and this inevitably requires large compute and data. Our main contribution is showing that a very small amount of human feedback data and computation is sufficient for guiding a pre-trained diffusion model to do what it can already do while suppressing undesirable behaviors.

## 1.1 Background on diffusion probabilistic models

Due to space constraints, we defer the comprehensive review of prior works to Appendix D. In this section, we briefly review the standard methods of diffusion probabilistic models (DPM) and set up the notation. For the sake of simplicity and specificity, we only consider the DPMs with the variance preserving SDE.

Consider the *variance preserving (VP)* SDE

$$dX_t = -\frac{\beta_t}{2}X_t dt + \sqrt{\beta_t}dW_t, \quad X_0 \sim p_0 \quad (1)$$

for  $t \in [0, T]$ , where  $\beta_t > 0$ ,  $X_t \in \mathbb{R}^d$ , and  $W_t$  is a  $d$ -dimensional Brownian motion. The process  $\{X_t\}_{t \in [0, T]}$  has the marginal distributions given by

$$X_t \stackrel{\mathcal{D}}{=} \sqrt{\alpha_t}X_0 + \sqrt{1 - \alpha_t}\varepsilon_t, \quad \alpha_t = e^{-\int_0^t \beta_s ds}, \quad \varepsilon_t \sim \mathcal{N}(0, I)$$

for  $t \in [0, T]$  [39, Chapter 5.5]. Let  $p_t$  denote the density for  $X_t$  for  $t \in [0, T]$ . Anderson’s theorem [1] tells us that the reverse-time SDE by

$$d\bar{X}_t = \beta_t \left( -\nabla \log p_t(\bar{X}_t) - \frac{1}{2}\bar{X}_t \right) dt + \sqrt{\beta_t}d\bar{W}_t, \quad \bar{X}_T \sim p_T,$$

where  $\{\bar{W}_t\}_{t \in [0, T]}$  is a reverse-time Brownian motion, satisfies  $\bar{X}_t \stackrel{\mathcal{D}}{=} X_t \sim p_t$ .

In DPMs, the initial distribution is set as the data distribution, i.e.,  $p_0 = p_{\text{data}}$  in (1), and a *score network*  $s_\theta$  is trained so that  $s_\theta(X_t, t) \approx \nabla \log p_t(X_t)$ . For notational convenience, one often uses the *error network*  $\varepsilon_\theta(X_t, t) = -\sqrt{1 - \alpha_t}s_\theta(X_t, t)$ . Then, the reverse-time SDE is approximated by

$$d\bar{X}_t = \beta_t \left( \frac{1}{\sqrt{1 - \alpha_t}}\varepsilon_\theta(\bar{X}_t, t) - \frac{1}{2}\bar{X}_t \right) dt + \sqrt{\beta_t}d\bar{W}_t, \quad \bar{X}_T \sim \mathcal{N}(0, I)$$

for  $t \in [0, T]$ .

When an image  $X$  has a corresponding label  $Y$ , classifier guidance [40, 12] generates images from

$$p_t(X_t | Y) \propto p_t(X_t, Y) = p_t(X_t)p_t(Y | X_t)$$

for  $t \in [0, T]$  using

$$\begin{aligned} \hat{\varepsilon}_\theta(\bar{X}_t, t) &= \varepsilon_\theta(\bar{X}_t, t) - \omega \sqrt{1 - \alpha_t} \nabla \log p_t(Y | \bar{X}_t) \\ d\bar{X}_t &= \beta_t \left( \frac{1}{\sqrt{1 - \alpha_t}}\hat{\varepsilon}_\theta(\bar{X}_t, t) - \frac{1}{2}\bar{X}_t \right) dt + \sqrt{\beta_t}d\bar{W}_t, \quad \bar{X}_T \sim \mathcal{N}(0, I), \end{aligned}$$

where  $\omega > 0$ . This requires training a separate time-dependent classifier approximating  $p_t(Y | X_t)$ .

## 2 Problem description: Censored sampling with human feedback

Informally, our goal is:

Given a pre-trained diffusion model that is partially misaligned in the sense that generates both “good” and “bad” images, fix/modify the generation process so that only good images are produced.

The meaning of “good” and “bad” depends on the context and will be specified through human feedback. For the sake of precision, we define the terms “benign” and “malign” to refer to the good and bad images: A generated image is *malign* if it contains unwanted features to be censored and is *benign* if it is not malign.

Our assumptions are: (i) the pre-trained diffusion model does not know which images are benign or malign, (ii) a human is willing to provide minimal ( $\sim 3$  minutes) feedback to distinguish benign and malign images, and (iii) the compute budget is limited.

**Mathematical formalism.** Suppose a pre-trained diffusion model generates images from distribution  $p_{\text{data}}(x)$  containing both benign and malign images. Assume there is a function  $r(x) \in (0, 1)$  representing the likelihood of  $x$  being benign, i.e.,  $r(x) \approx 1$  means image  $x$  is benign and should be considered for sampling while  $r(x) \approx 0$  means image  $x$  is malign and should not be sampled. We mathematically formalize our goal as: Sample from the censored distribution

$$p_{\text{censor}}(x) \propto p_{\text{data}}(x)r(x).$$

**Human feedback.** The definition of benign and malign images are specified through human feedback. Specifically, we ask a human annotator to provide binary feedback  $Y \in \{0, 1\}$  for each image  $X$  through a simple graphical user interface shown in Appendix E. The feedback takes 1–3 human-minutes for the relatively easier censoring tasks and at most 10–20 human-minutes for the most complex task that we consider. Using the feedback data, we train a *reward model*  $r_\psi \approx r$ , which we further detail in Section 3.

**Evaluation.** The evaluation criterion of our methodology are the human time spent providing feedback, quantified by direct measurement, and sample quality, quantified by precision and recall.

In this context, *precision* is the proportion of benign images, and *recall* is the sample diversity of the censored generation. Precision can be directly measured by asking human annotators to label the final generated images, but recall is more difficult to measure. Therefore, we primarily focus on precision for quantitative evaluation. We evaluate recall qualitatively by providing the generated images for visual inspection.

## 3 Reward model and human feedback

Let  $Y$  be a random variable such that  $Y = 1$  if  $X$  is benign and  $Y = 0$  if  $X$  is malign. Define the time-independent reward function as

$$r(X) = \mathbb{P}(Y = 1 \mid X).$$

As we later discuss in Section 4, time-dependent guidance requires a time-dependent reward function. Specifically, let  $X \sim p_{\text{data}}$  and  $Y$  be its label. Let  $\{X_t\}_{t \in [0, T]}$  be images corrupted by the VP SDE (1) with  $X_0 = X$ . Define the time-dependent reward function as

$$r_t(X_t) = \mathbb{P}(Y = 1 \mid X_t) \quad \text{for } t \in [0, T].$$

We approximate the reward function  $r$  with a *reward model*  $r_\psi$ , i.e., we train

$$r_\psi(X) \approx r(X) \quad \text{or} \quad r_\psi(X_t, t) \approx r_t(X_t),$$

using human feedback data  $(X^{(1)}, Y^{(1)}), \dots, (X^{(N)}, Y^{(N)})$ . (So the time-dependent reward model uses  $(X_t^{(n)}, Y^{(n)})$  as training data.) We use weighted binary cross entropy loss. In this section, we describe the most essential components of the reward model while deferring details to Appendix F.

The main technical challenge is achieving extreme human-feedback efficiency. Specifically, we have  $N < 100$  in most setups we consider. Finally, we clarify that the diffusion model (score network) is not trained or fine-tuned. We use relatively large pre-trained diffusion models [12, 36], but we only train the relatively lightweight reward model  $r_\psi$ .



---

**Algorithm 1** Reward model ensemble

---

**Require:** Images: malign  $\{X^{(1)}, \dots, X^{(N_M)}\}$ , benign  $\{X^{(N_M+1)}, \dots, X^{(N_M+N_B)}\}$  ( $N_M < N_B$ )  
**for**  $k = 1, \dots, K$  **do**  
    Randomly select with replacement  $N_M$  benign samples  $X^{(N_M+i_1)}, \dots, X^{(N_M+i_{N_M})}$ .  
    Train reward model  $r_{\psi_k}^{(k)}$  with  $\{X^{(1)}, \dots, X^{(N_M)}\} \cup \{X^{(N_M+i_1)}, \dots, X^{(N_M+i_{N_M})}\}$ .  
**end for**  
**return**  $r_\psi = \prod_{k=1}^K r_{\psi_k}^{(k)}$

---

---

**Algorithm 2** Imitation learning of reward model

---

**Require:** Pre-trained  $\varepsilon_\theta$ . Initialize  $\mathcal{D} = \emptyset$ .  
Sample  $X^{(1)}, \dots, X^{(N_1)}$  using  $\varepsilon_\theta$  and no censoring.  
Receive  $Y^{(1)}, \dots, Y^{(N_1)}$  from human feedback. Add data to buffer:  $\mathcal{D} \leftarrow \{(X^{(i)}, Y^{(i)})\}_{i=1}^{N_1}$ .  
Train reward model  $r_\psi$  with  $\mathcal{D}$ .  
**for**  $r = 2, \dots, R$  **do**  
    Sample  $X^{(1)}, \dots, X^{(N_r)}$  using  $\varepsilon_\theta$  and censoring with  $r_\psi$ .  
    Receive  $Y^{(1)}, \dots, Y^{(N_r)}$  from human feedback. Add data to buffer:  $\mathcal{D} \leftarrow \{(X^{(i)}, Y^{(i)})\}_{i=1}^{N_r}$ .  
    Train reward model  $r_\psi$  with  $\mathcal{D}$ .  
**end for**  
**return**  $r_\psi$

---

### 105 3.1 Reward model ensemble for benign-dominant setups

106 In some setups, benign images constitute the majority of uncensored generation. Section 5.2 considers  
107 such a *benign-dominant* setup, where 11.4% of images have stock photo watermarks and the goal is  
108 to censor the watermarks. A random sample of images provided to a human annotator will contain  
109 far more benign than malign images.

110 To efficiently utilize the imbalanced data in a sample-efficient way, we propose an ensemble method  
111 loosely inspired by ensemble-based sample efficient RL methods [23, 6]. The method trains  $K$   
112 reward models  $r_{\psi_1}^{(1)}, \dots, r_{\psi_K}^{(K)}$ , each using a shared set of  $N_M$  (scarce) malign images joined with  
113  $N_M$  benign images randomly subsampled bootstrap-style from the provided pool of  $N_B$  (abundant)  
114 benign data as in Algorithm 1. The final reward model is formed as  $r_\psi = \prod_{k=1}^K r_{\psi_k}^{(k)}$ . Given that  
115 a product becomes small when any of its factor is small,  $r_\psi$  is effectively asking for unanimous  
116 approval across  $r_{\psi_1}^{(1)}, \dots, r_{\psi_K}^{(K)}$ .

117 In experiments, we use  $K = 5$ . We use the same neural network architecture for  $r_{\psi_1}^{(1)}, \dots, r_{\psi_K}^{(K)}$ , whose  
118 parameters  $\psi_1, \dots, \psi_K$  are either independently randomly initialized or transferred from the same  
119 pre-trained weights as discussed in Section 3.3. We observe that the ensemble method significantly  
120 improves the precision of the model without perceivably sacrificing recall.

### 121 3.2 Imitation learning for malign-dominant setups

122 In some setups, malign images constitute the majority of uncensored generation. Section 5.3 considers  
123 such a *malign-dominant* setup, where 69% of images are tench (fish) images with human faces and  
124 the goal is to censor the images with human faces. Since the ratio of malign images starts out high, a  
125 single round of human feedback and censoring may not sufficiently reduce the malign ratio.

126 Therefore, we propose an imitation learning method loosely inspired by imitation learning RL methods  
127 such as DAgger [37]. The method collects human feedback data in multiple rounds and improves the  
128 reward model over the rounds as described in Algorithm 2. Our experiment of Section 5.3 indicates  
129 that 2–3 rounds of imitation learning dramatically reduce the ratio of malign images. Furthermore,  
130 imitation learning is a practical model of an online scenario where one continuously trains and  
131 updates the reward model  $r_\psi$  while the diffusion model is continually deployed.

**Ensemble vs. imitation learning.** In the benign-dominant setup, imitation learning is too costly in terms of human feedback since acquiring sufficiently many ( $\sim 10$ ) malign labels may require the human annotator to go through too many benign labels ( $\sim 1000$ ) for the second round of human feedback and censoring. In the malign-dominant setup, one can use a reward model ensemble, where reward models share the benign data while bootstrap-subsampling the malign data, but we empirically observe this to be ineffective. We attribute this asymmetry to the greater importance of malign data over benign data; the training objective is designed so as our primary goal is to censor malign images.

### 3.3 Transfer learning

To further improve human-feedback efficiency, we use transfer learning. Specifically, we take a ResNet18 model [17, 18] pre-trained on ImageNet1k [10] and replace the final layer with randomly initialized fully connected layers which have 1-dimensional output features. We observe training all layers to be more effective than training only the final layers. We note that transfer is appropriate for training a time-independent reward model, as pre-trained time-dependent classifiers are less common.

## 4 Sampling

In this section, we describe how to perform censored sampling with a trained reward model  $r_\psi$ . We follow the notation of Section 1.1.

**Time-dependent guidance.** Given a time-dependent reward model  $r_\psi(X_t, t)$ , our censored generation follows the SDE

$$\begin{aligned}\hat{\varepsilon}_\theta(\bar{X}_t, t) &= \varepsilon_\theta(\bar{X}_t, t) - \omega\sqrt{1 - \alpha_t}\nabla \log r_t(\bar{X}_t) \\ d\bar{X}_t &= \beta_t \left( \frac{1}{\sqrt{1 - \alpha_t}} \hat{\varepsilon}_\theta(\bar{X}_t, t) - \frac{1}{2} \bar{X}_t \right) dt + \sqrt{\beta_t} d\bar{W}_t, \quad \bar{X}_T \sim \mathcal{N}(0, I)\end{aligned}\quad (2)$$

for  $t \in [0, T]$  with  $\omega > 0$ . From the standard classifier-guidance arguments [42, Section I], it follows that  $X_0 \sim p_{\text{censor}}(x) \propto p_{\text{data}}(x)r(x)$  approximately when  $\omega = 1$ . The parameter  $\omega > 0$ , which we refer to as the *guidance weight*, controls the strength of the guidance, and it is analogous to the “gradient scale” used in prior works [12]. Using  $\omega > 1$  can be viewed as a heuristic to strengthen the effect of the guidance, or it can be viewed as an effort to sample from  $p_{\text{censor}}^{(\omega)} \propto p_{\text{data}}r^\omega$ .

**Time-independent guidance.** Given a time-independent reward model  $r_\psi(X_t)$ , we adopt the ideas of universal guidance [2] and perform censored generation via replacing the  $\hat{\varepsilon}_\theta$  of (2) with

$$\begin{aligned}\hat{\varepsilon}_\theta(\bar{X}_t, t) &= \varepsilon_\theta(\bar{X}_t, t) - \omega\sqrt{1 - \alpha_t}\nabla \log r(\hat{X}_0), \quad \text{where} \\ \hat{X}_0 &= \mathbb{E}[X_0 | X_t = \bar{X}_t] = \frac{\bar{X}_t - \sqrt{1 - \alpha_t}\varepsilon_\theta(\bar{X}_t, t)}{\sqrt{\alpha_t}}\end{aligned}\quad (3)$$

for  $t \in [0, T]$  with  $\omega > 0$ . To clarify,  $\nabla$  differentiates through  $\hat{X}_0$ . While this method has no mathematical guarantees, prior work [2] has shown strong empirical performance in related setups.<sup>2</sup>

**Backward guidance and recurrence.** The prior work [2] proposes *backward guidance* and *self-recurrence* to further strengthen the guidance. We find that adapting these methods to our setup improves the censoring performance. We provide the detailed description in Appendix G.

## 5 Experiments

We now present the experimental results. Precision (censoring performance) was evaluated with human annotators labeling generated images. The human feedback time we report includes annotation of training data for the reward model  $r_\psi$ , but does not include the annotation of the evaluation data.

<sup>2</sup>If we simply perform time-dependent guidance with a time-independent reward function  $r_\psi(X)$ , the observed performance is poor. This is because  $r_\psi(X)$  fails to provide meaningful guidance when the input is noisy, and this empirical behavior agrees with the prior observations of [32, Section 2.4] and [2, Section 3.1].

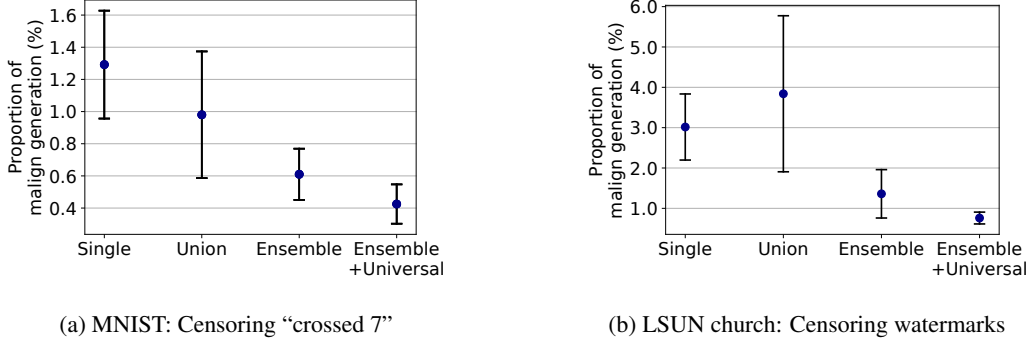

Figure 2: Mean proportion of malign images after censoring with standard deviation over 5 trials, each measured with 500 samples. Reward ensemble outperforms non-ensemble models, and the universal guidance components further improve the results. **Left:** Censoring “crossed 7” from MNIST. Before censoring, the proportion is 11.9%. The mean values of each point are: 1.30%, 0.98%, 0.60%, and **0.42%**. **Right:** Censoring watermarks from LSUN Church. Before censoring, the proportion is 11.4%. The mean values of each point are: 3.02%, 3.84%, 1.36%, and **0.76%**.

## 5.1 MNIST: Censoring 7 with a strike-through cross

In this setup, we censor a handwriting variation called “crossed 7”, which has a horizontal stroke running across the digit, from an MNIST generation, as shown in Figure 1a. We pre-train our own diffusion model (score network). In this benign-dominant setup, the baseline model generates about 11.9% malign images.

We use 10 malign samples to perform censoring. This requires about 100 human feedback labels in total, which takes less than 2 minutes to collect. We observe that such minimal feedback is sufficient for reducing the proportion of crossed 7s to 0.42% as shown in Figure 1b and Figure 2a. Further details are provided in Appendix H.

**Ablation studies.** We achieve our best results by combining the time-dependent reward model ensemble method described in Section 3.1 and the universal guidance components (backward guidance with recurrence) detailed in Appendix G. We verify the effectiveness of each component through an ablation study, summarized in Figure 2a. Specifically, we compare the censoring results using a reward model ensemble (labeled “**Ensemble**” in Figure 2a) with the cases of using (i) a single reward model within the ensemble (trained on 10 malign and 10 benign images; labeled “**Single**”) and (ii) a standalone reward model separately trained on the union of all training data (10 malign and 50 benign images; labeled “**Union**”) used in ensemble training. We also show that the backward and recurrence components do provide an additional benefit (labeled “**Ensemble+Universal**”).

## 5.2 LSUN church: Censoring watermarks from latent diffusion model

In the previous experiment, we use a full-dimensional diffusion model that reverses the forward diffusion (1) in the pixel space. In this experiment, we demonstrate that censored generation with minimal human feedback also works with latent diffusion models (LDMs) [45, 36], which perform diffusion on a lower-dimensional latent representation of (variational) autoencoders. We use an LDM<sup>3</sup> pre-trained on the  $256 \times 256$  LSUN Churches [36] and censor the stock photo watermarks. In this benign-dominant setup, the baseline model generates about 11.4% malign images.

Training a time-dependent reward model in the latent space to be used with an LDM would introduce additional complicating factors. Therefore, for simplicity and to demonstrate multiple censoring methods, we train a time-independent reward model ensemble and apply time-independent guidance as outlined in Section 4. To enhance human-feedback efficiency, we use a pre-trained ResNet18 model and use transfer learning as discussed in Section 3.3. We use 30 malign images, and the human feedback takes approximately 3 minutes. We observe that this is sufficient for reducing the proportion of images with watermarks to 0.76% as shown in Figure 1d and Figure 2b. Further details are provided in Appendix I.

<sup>3</sup><https://github.com/CompVis/latent-diffusion>

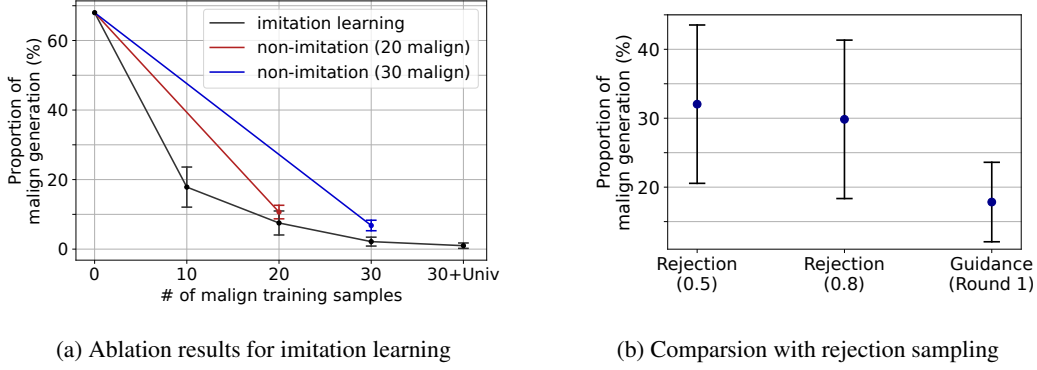

Figure 3: Mean proportion of malign tench images (w/ human face) with standard deviation over 5 trials, each measured with 1000 samples. **Left:** Before censoring, the proportion is 68.6%. Using imitation learning and universal guidance, it progressively drops to 17.8%, 7.5%, 2.2%, and **1.0%**. Non-imitation learning is worse: with 20 and 30 malign images, the proportions are 10.7% and 6.8%. **Right:** With acceptance thresholds 0.5 and 0.8, rejection sampling via reward models from round 1 produces 32.0% and 29.8% of malign images, worse than our proposed guidance-based censoring.

**Ablation studies.** We achieve our best results by combining the time-independent reward model ensemble method described in Section 3.1 and the universal guidance components (backward guidance with recurrence) detailed in Appendix G. As in Section 5.1, we verify the effectiveness of each component through an ablation study, summarized in Figure 2b. The label names follow the same rules as in Section 5.1. Notably, on average, the “single” models trained with 30 malign and 30 benign samples outperform the “union” models trained with 30 malign and 150 malign samples.

### 5.3 ImageNet: Tench (fish) without human faces

Although the ImageNet1k dataset contains no explicit human classes, the dataset does contain human faces, and diffusion models have a tendency to memorize them [7]. This creates potential privacy risks through the use of reverse image search engines [3]. A primary example is the ImageNet class “tench” (fish), in which the majority of images are humans holding their catch with their celebrating faces clearly visible and learnable by the diffusion model.

In this experiment, we use a conditional diffusion model<sup>4</sup> pre-trained on the  $128 \times 128$  ImageNet dataset [12] as baseline and censor the instances of class “tench” containing human faces (but not other human body parts such as hands and arms). In this malign-dominant setup, the baseline model generates about 68.6% malign images.

We perform 3 rounds of imitation learning with 10 malign and 10 benign images in each round to train a single reward model. The human feedback takes no more than 3 minutes in total. We observe that this is sufficient for reducing the proportion of images with human faces to 1.0% as shown in Figure 1f and Figure 3. Further details are provided in Appendix J.

**Ablation studies.** We verify the effectiveness of imitation learning by comparing it with training the reward model at once using the same number of total samples. Specifically, we use 20 malign and 20 benign samples from the baseline generation to train a reward model (labeled “**non-imitation (20 malign)**”) in Figure 3a) and compare the censoring results with round 2 of imitation learning; similarly we compare training at once with 30 malign and 30 benign samples (labeled “**non-imitation (30 malign)**”) and compare with round 3. We consistently attain better results with imitation learning. As in previous experiments, the best precision is attained when backward and recurrence are combined with imitation learning (labeled “**30+Univ**”).

We additionally compare our censoring method with another approach: rejection sampling, which simply generates samples from the baseline model and rejects samples  $X$  such that  $r_\psi(X)$  is less than the given acceptance threshold. Figure 3b shows that rejection sampling yields worse precision compared to the guided generation using the same reward model, even when using the conservative threshold 0.8. We also note that rejection sampling in this setup accepts only 28.2% and 25.5% of

<sup>4</sup><https://github.com/openai/guided-diffusion>

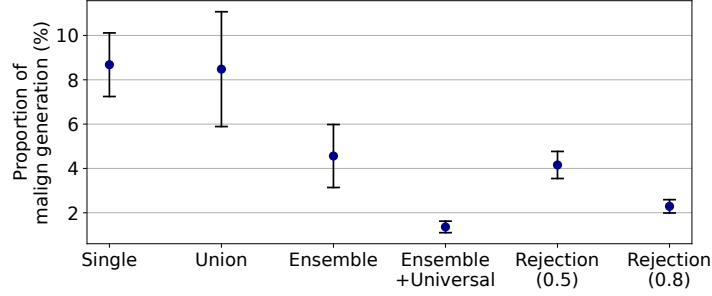

Figure 4: Mean proportion of malignant (broken) bedroom images with standard deviation over 5 trials, each measured with 500 samples. Before censoring, the malignant proportion is 12.6%. The mean values of each point are: 8.68%, 8.48%, 4.56%, **1.36%**, 4.16%, and 2.30%.

the generated samples respectively for thresholds 0.5 and 0.8 on average, making it suboptimal for situations where reliable real-time generation is required.

#### 5.4 LSUN bedroom: Censoring broken bedrooms

Generative models often produce images with visual artifacts that are apparent to humans but are difficult to detect and remove via automated pipelines. In this experiment, we use a pre-trained diffusion model<sup>5</sup> trained on  $256 \times 256$  LSUN Bedroom images [12] and censor “broken” images as perceived by humans. In Appendix K, we precisely define the types of images we consider to be broken, thereby minimizing subjectivity. In this benign-dominant setup, the baseline model generates about 12.6% malignant images.

This censoring task is the most difficult one we consider, and we use 100 malignant samples to train a reward-model ensemble. This requires about 900 human feedback labels, which takes about 15 minutes to collect. To enhance human-feedback efficiency, we use a pre-trained ResNet18 model and use transfer learning as discussed in Section 3.3. We observe that this is sufficient for reducing the proportion of malignant images to 1.36% as shown in Figure 1h and Figure 4. Further details are provided in Appendix K.

**Ablation studies.** We achieve our best results by combining the (time-independent) reward ensemble and backward guidance with recurrence. We verify the effectiveness of each component through an ablation study summarized in Figure 4. We additionally find that rejection sampling, which rejects a sample  $X$  such that  $\frac{1}{K} \sum_{k=1}^K r_{\psi_k}^{(k)}(X)$  is less than a threshold, yields worse precision compared to the guided generation using the ensemble model and has undesirably low average acceptance ratios of 74.5% and 55.8% when using threshold values 0.5 and 0.8, respectively.

## 6 Conclusion

In this work, we present censored sampling of diffusion models based on minimal human feedback and compute. The procedure is conceptually simple, versatile, and easily executable, and we anticipate our approach to find broad use in aligning diffusion models. In our view, that diffusion models can be controlled with extreme data-efficiency, without fine-tuning of the main model weights, is an interesting observation in its own right (although the concept of guided sampling itself is, of course, not new [40, 12, 32, 35]). We are not aware of analogous results from other generative models such as GANs or language models; this ability to adapt/guide diffusion models with external reward functions seems to be a unique trait, and we believe it offers a promising direction of future work on leveraging human feedback with extreme sample efficiency.

<sup>5</sup><https://github.com/openai/guided-diffusion>



## References

- [1] B. D. Anderson. Reverse-time diffusion equation models. *Stochastic Processes and their Applications*, 12(3):313–326, 1982.
- [2] A. Bansal, H.-M. Chu, A. Schwarzschild, S. Sengupta, M. Goldblum, J. Geiping, and T. Goldstein. Universal guidance for diffusion models. *arXiv preprint arXiv:2302.07121*, 2023.
- [3] A. Birhane and V. U. Prabhu. Large image datasets: A pyrrhic win for computer vision? *WACV*, 2021.
- [4] R. Bommasani, D. A. Hudson, E. Adeli, R. Altman, S. Arora, S. von Arx, M. S. Bernstein, J. Bohg, A. Bosselut, E. Brunskill, E. Brynjolfsson, S. Buch, D. Card, R. Castellon, N. S. Chatterji, A. S. Chen, K. A. Creel, J. Davis, D. Demszky, C. Donahue, M. Doumbouya, E. Durmus, S. Ermon, J. Etchemendy, K. Ethayarajh, L. Fei-Fei, C. Finn, T. Gale, L. E. Gillespie, K. Goel, N. D. Goodman, S. Grossman, N. Guha, T. Hashimoto, P. Henderson, J. Hewitt, D. E. Ho, J. Hong, K. Hsu, J. Huang, T. F. Icard, S. Jain, D. Jurafsky, P. Kalluri, S. Karamcheti, G. Keeling, F. Khani, O. Khattab, P. W. Koh, M. S. Krass, R. Krishna, R. Kudithipudi, A. Kumar, F. Ladhak, M. Lee, T. Lee, J. Leskovec, I. Levent, X. L. Li, X. Li, T. Ma, A. Malik, C. D. Manning, S. P. Mirchandani, E. Mitchell, Z. Muniyikwa, S. Nair, A. Narayan, D. Narayanan, B. Newman, A. Nie, J. C. Niebles, H. Nilforoshan, J. F. Nyarko, G. Ogut, L. Orr, I. Papadimitriou, J. S. Park, C. Piech, E. Portelance, C. Potts, A. Raghunathan, R. Reich, H. Ren, F. Rong, Y. H. Roohani, C. Ruiz, J. Ryan, C. R’e, D. Sadigh, S. Sagawa, K. Santhanam, A. Shih, K. P. Srinivasan, A. Tamkin, R. Taori, A. W. Thomas, F. Tramèr, R. E. Wang, W. Wang, B. Wu, J. Wu, Y. Wu, S. M. Xie, M. Yasunaga, J. You, M. A. Zaharia, M. Zhang, T. Zhang, X. Zhang, Y. Zhang, L. Zheng, K. Zhou, and P. Liang. On the opportunities and risks of foundation models. *arXiv preprint arXiv:2108.07258*, 2021.
- [5] R. A. Bradley and M. E. Terry. Rank analysis of incomplete block designs: I. the method of paired comparisons. *Biometrika*, 39(3–4):324–345, 1952.
- [6] J. Buckman, D. Hafner, G. Tucker, E. Brevdo, and H. Lee. Sample-efficient reinforcement learning with stochastic ensemble value expansion. *NeurIPS*, 2018.
- [7] N. Carlini, J. Hayes, M. Nasr, M. Jagielski, V. Sehwag, F. Tramèr, B. Balle, D. Ippolito, and E. Wallace. Extracting training data from diffusion models. *arXiv preprint arXiv:2301.13188*, 2023.
- [8] T. Chong, I.-C. Shen, I. Sato, and T. Igarashi. Interactive optimization of generative image modelling using sequential subspace search and content-based guidance. *Computer Graphics Forum*, 2021.
- [9] P. F. Christiano, J. Leike, T. Brown, M. Martic, S. Legg, and D. Amodei. Deep reinforcement learning from human preferences. *NeurIPS*, 2017.
- [10] J. Deng, W. Dong, R. Socher, L.-J. Li, K. Li, and F.-F. Li. ImageNet: A large-scale hierarchical image database. *CVPR*, 2009.
- [11] L. Deng. The mnist database of handwritten digit images for machine learning research. *IEEE Signal Processing Magazine*, 29(6):141–142, 2012.
- [12] P. Dhariwal and A. Nichol. Diffusion models beat GANs on image synthesis. *NeurIPS*, 2021.
- [13] R. O. Duda, P. E. Hart, and D. G. Stork. *Pattern Classification*. John Wiley & Sons, 2006.
- [14] B. Efron. Estimating the error rate of a prediction rule: Improvement on cross-validation. *Journal of the American statistical association*, 78(382):316–331, 1983.
- [15] B. Efron and R. Tibshirani. Improvements on cross-validation: The 632+ bootstrap method. *Journal of the American Statistical Association*, 92(438):548–560, 1997.
- [16] R. Gandikota, J. Materzynska, J. Fiotto-Kaufman, and D. Bau. Erasing concepts from diffusion models. *arXiv preprint arXiv:2303.07345*, 2023.

- [17] K. He, X. Zhang, S. Ren, and J. Sun. Deep residual learning for image recognition. *CVPR*, 2016.
- [18] K. He, X. Zhang, S. Ren, and J. Sun. Identity mappings in deep residual networks. *ECCV*, 2016.
- [19] J. Ho, A. Jain, and P. Abbeel. Denoising diffusion probabilistic models. *NeurIPS*, 2020.
- [20] J. Ho and T. Salimans. Classifier-free diffusion guidance. *NeurIPS Workshop on Deep Generative Models*, 2021.
- [21] B. Kavar, R. Ganz, and M. Elad. Enhancing diffusion-based image synthesis with robust classifier guidance. *Transactions on Machine Learning Research*, 2023.
- [22] D. Kim, Y. Kim, S. J. Kwon, W. Kang, and I.-C. Moon. Refining generative process with discriminator guidance in score-based diffusion models. *ICML*, 2023.
- [23] T. Kurutach, I. Clavera, Y. Duan, A. Tamar, and P. Abbeel. Model-ensemble trust-region policy optimization. *ICLR*, 2018.
- [24] A. K. Lampinen, D. So, D. Eck, and F. Bertsch. Improving image generative models with human interactions. *arXiv preprint arXiv:1709.10459*, 2017.
- [25] K. Lee, H. Liu, M. Ryu, O. Watkins, Y. Du, C. Boutilier, P. Abbeel, M. Ghavamzadeh, and S. S. Gu. Aligning text-to-image models using human feedback. *arXiv preprint arXiv:2302.12192*, 2023.
- [26] K. Lee, L. Smith, and P. Abbeel. PEBBLE: Feedback-efficient interactive reinforcement learning via relabeling experience and unsupervised pre-training. *ICML*, 2021.
- [27] I. Loshchilov and F. Hutter. Decoupled weight decay regularization. *ICLR*, 2019.
- [28] T. Moon, M. Choi, G. Lee, J.-W. Ha, and J. Lee. Fine-tuning diffusion models with limited data. *NeurIPS 2022 Workshop on Score-Based Methods*, 2022.
- [29] MosaicML. Training stable diffusion from scratch costs <160k. <https://www.mosaicml.com/blog/training-stable-diffusion-from-scratch-costs-160k>. Accessed: 2023-05-01.
- [30] E. Mostaque. (@EMostaque) “We actually used 256 A100s for this per the model card, 150k hours in total so at market price \$600k”. <https://twitter.com/EMostaque/status/1563870674111832066>. Accessed: 2023-05-01.
- [31] A. Q. Nichol and P. Dhariwal. Improved denoising diffusion probabilistic models. *ICML*, 2021.
- [32] A. Q. Nichol, P. Dhariwal, A. Ramesh, P. Shyam, P. Mishkin, B. McGrew, I. Sutskever, and M. Chen. GLIDE: Towards photorealistic image generation and editing with text-guided diffusion models. *ICML*, 2022.
- [33] L. Ouyang, J. Wu, X. Jiang, D. Almeida, C. L. Wainwright, P. Mishkin, C. Zhang, S. Agarwal, K. Slama, A. Ray, J. Schulman, J. Hilton, F. Kelton, L. Miller, M. Simens, A. Askell, P. Welinder, P. Christiano, J. Leike, and R. Lowe. Training language models to follow instructions with human feedback. *NeurIPS*, 2022.
- [34] R. Ramamurthy, P. Ammanabrolu, K. Brantley, J. Hessel, R. Sifa, C. Bauckhage, H. Hajishirzi, and Y. Choi. Is reinforcement learning (not) for natural language processing: Benchmarks, baselines, and building blocks for natural language policy optimization. *ICLR*, 2023.
- [35] A. Ramesh, P. Dhariwal, A. Nichol, C. Chu, and M. Chen. Hierarchical text-conditional image generation with CLIP latents. *arXiv preprint arXiv:2204.06125*, 2022.
- [36] R. Rombach, A. Blattmann, D. Lorenz, P. Esser, and B. Ommer. High-resolution image synthesis with latent diffusion models. *CVPR*, 2022.

- [37] S. Ross, G. Gordon, and D. Bagnell. A reduction of imitation learning and structured prediction to no-regret online learning. *AISTATS*, 2011.
- [38] C. Saharia, W. Chan, S. Saxena, L. Li, J. Whang, E. Denton, S. K. S. Ghasemipour, B. K. Ayan, S. S. Mahdavi, R. G. Lopes, T. Salimans, J. Ho, D. J. Fleet, and M. Norouzi. Photorealistic text-to-image diffusion models with deep language understanding. *NeurIPS*, 2022.
- [39] S. Särkkä and A. Solin. *Applied Stochastic Differential Equations*. Cambridge University Press, 2019.
- [40] J. Sohl-Dickstein, E. A. Weiss, N. Maheswaranathan, and S. Ganguli. Deep unsupervised learning using nonequilibrium thermodynamics. *ICML*, 2015.
- [41] J. Song, C. Meng, and S. Ermon. Denoising diffusion implicit models. *ICLR*, 2021.
- [42] Y. Song, J. Sohl-Dickstein, D. P. Kingma, A. Kumar, S. Ermon, and B. Poole. Score-based generative modeling through stochastic differential equations. *ICLR*, 2021.
- [43] N. Stiennon, L. Ouyang, J. Wu, D. Ziegler, R. Lowe, C. Voss, A. Radford, D. Amodei, and P. F. Christiano. Learning to summarize with human feedback. *NeurIPS*, 2020.
- [44] S. Um and J. C. Ye. Don’t play favorites: Minority guidance for diffusion models. *arXiv preprint arXiv:2301.12334*, 2023.
- [45] A. Vahdat, K. Kreis, and J. Kautz. Score-based generative modeling in latent space. *NeurIPS*, 2021.
- [46] F. Yu, A. Seff, Y. Zhang, S. Song, T. Funkhouser, and J. Xiao. LSUN: Construction of a large-scale image dataset using deep learning with humans in the loop. *arXiv preprint arXiv:1506.03365*, 2015.
- [47] E. Zhang, K. Wang, X. Xu, Z. Wang, and H. Shi. Forget-me-not: Learning to forget in text-to-image diffusion models. *arXiv preprint arXiv:2303.17591*, 2023.
- [48] J.-Y. Zhu, P. Krähenbühl, E. Shechtman, and A. A. Efros. Generative visual manipulation on the natural image manifold. *ECCV*, 2016.
- [49] D. M. Ziegler, N. Stiennon, J. Wu, T. B. Brown, A. Radford, D. Amodei, P. Christiano, and G. Irving. Fine-tuning language models from human preferences. *arXiv preprint arXiv:1909.08593*, 2019.

## 382 **A Broader impacts & safety**

383 As our research aims to suppress undesirable behaviors of diffusion models, our methodology carries  
384 the risk of being used maliciously to guide the diffusion model toward malicious behavior. Generally,  
385 research on alignment carries the risk of being flipped to “align” the model with malicious behavior,  
386 and our work is no exception. However, despite this possibility, it is unlikely that our work will be  
387 responsible for producing new harmful materials that a baseline model is not already capable of, as  
388 we do not consider training new capabilities into diffusion models. In this sense, our work does not  
389 pose a greater risk of harm compared to other work on content filtering.

## 390 **B Limitations**

391 Our methodology accomplishes its main objective, but there are a few limitations we point out.  
392 First, although the execution of our methodology requires minimal (few minutes) human feedback,  
393 an objective *evaluation* of our methodology does require a non-trivial amount of human feedback.  
394 Indeed, even though we trained our reward models with 10s of human labels, our evaluation used  
395 1000s of human labels. Also, the methodology is built on the assumption of having access to pre-  
396 trained diffusion models, and it does not consider how to train new capabilities into the base model or  
397 improve the quality of generated images.

## 398 **C Human subject and evaluation**

399 The human feedback used in this work was provided by the authors themselves. We argue that  
400 our work does not require external human subjects as the labeling is based on concrete, minimally  
401 ambiguous criteria. For the setups of Sections 5.1 (“crossed 7”), 5.2 (“watermarks”), and 5.3 (“tench”)  
402 the criteria is very clear and objective. For the setup of Section 5.4 (“broken” bedroom images), we  
403 describe our decision protocol in Section K. For transparency, we present comprehensive censored  
404 generation results in Sections H to K.

405 We used existing datasets—ImageNet, LSUN, and MNIST—for our study. These are free of harmful  
406 or sensitive content, and there is no reason to expect the labeling task to have any adverse effect on  
407 the human subjects.

## D Prior Works

**DPM.** The initial diffusion probabilistic models (DPM) considered forward image corruption processes with finite discrete steps and trained neural networks to reverse them [40, 19, 41]. Later, this idea was connected to a continuous-time SDE formulation [42]. As the SDE formalism tends to be more mathematically and notationally elegant, we describe our methods through the SDE formalism, although all actual implementations require using an discretizations.

The generation process of DPMs is controllable through *guidance*. One approach to guidance is to use a conditional score network, conditioned on class labels or text information [31, 20, 32, 35, 38]. Alternatively, one can use guidance from another external network. Instances include CLIP guidance [32, 35], which performs guidance with a CLIP model pre-trained on image-caption pairs; discriminator guidance [22], which uses a discriminator network to further enforce consistency between generated images and training data; minority guidance [44], which uses perceptual distances to encourage sapling from low-density regions, and using a adversarially robust classifier [21] to better align the sample quality with human perception. In this work, we adapt the ideas of (time-dependent) classifier guidance of [40, 12] and universal guidance [2].

**RLHF.** Reinforcement learning with human feedback (RLHF) was originally proposed as a methodology for using feedback to train a reward model, when an explicit reward of the reinforcement learning setup is difficult to specify [9, 26]. However, RLHF techniques have been successfully used in natural language processing setups with no apparent connection to reinforcement learning [49, 43, 33]. While the RLHF mechanism in language domains is not fully understood, the success indicates that the general strategy of fine-tuning or adjusting the behavior of a pre-trained model with human feedback and reward models is a promising direction.

**Controlling generative models with human feedback.** The use of human feedback to fine-tune generative models has not yet received significant attention. The prior work of [24] aims to improve the aesthetic quality of the images produced by generative adversarial networks (GANs) using human feedback. There are methods that allow interactive editing of images produced by GANs (i.e., modifying images based on human feedback) but such methods do not fine-tune or modify the generation procedure of GANs [8, 48].

For DPMs, the prior work of [25] fine-tunes the pre-trained Stable Diffusion [36] model to have better image-text alignment using 27,000 of human annotations. There have been prior work on removing certain concepts from a pre-trained DPMs [16, 47] which involve human evaluations, but these approaches do not use human feedback in their methodologies.

**Reward models.** Many prior work utilizing human feedback utilize reward models in the form of a binary classifier, also called the Bradley–Terry model [5]. However, the specifics of the deep neural network architecture varies widely. In the original RLHF paper [9], the architecture seems to be simple MLPs and CNNs. In [33], the architecture is the same as the GPT-3 architecture except that the unembedding layer is replaced with a projection layer to output a scalar value. In [49, 43], the reward model is a linear function of the language embedding used in the policy network. In [34], the authors use transformer-based architectures to construct the reward models. Overall, the conclusion is that field has not yet converged to a particular type of reward model architecture that is different from the standard architectures used in related setups. Therefore, we use simple UNet and ResNet18 models for our reward model architectures.



## 450 E GUI interface

451 We collect human feedback using a very minimal graphical user interface (GUI), as shown in the  
452 following.

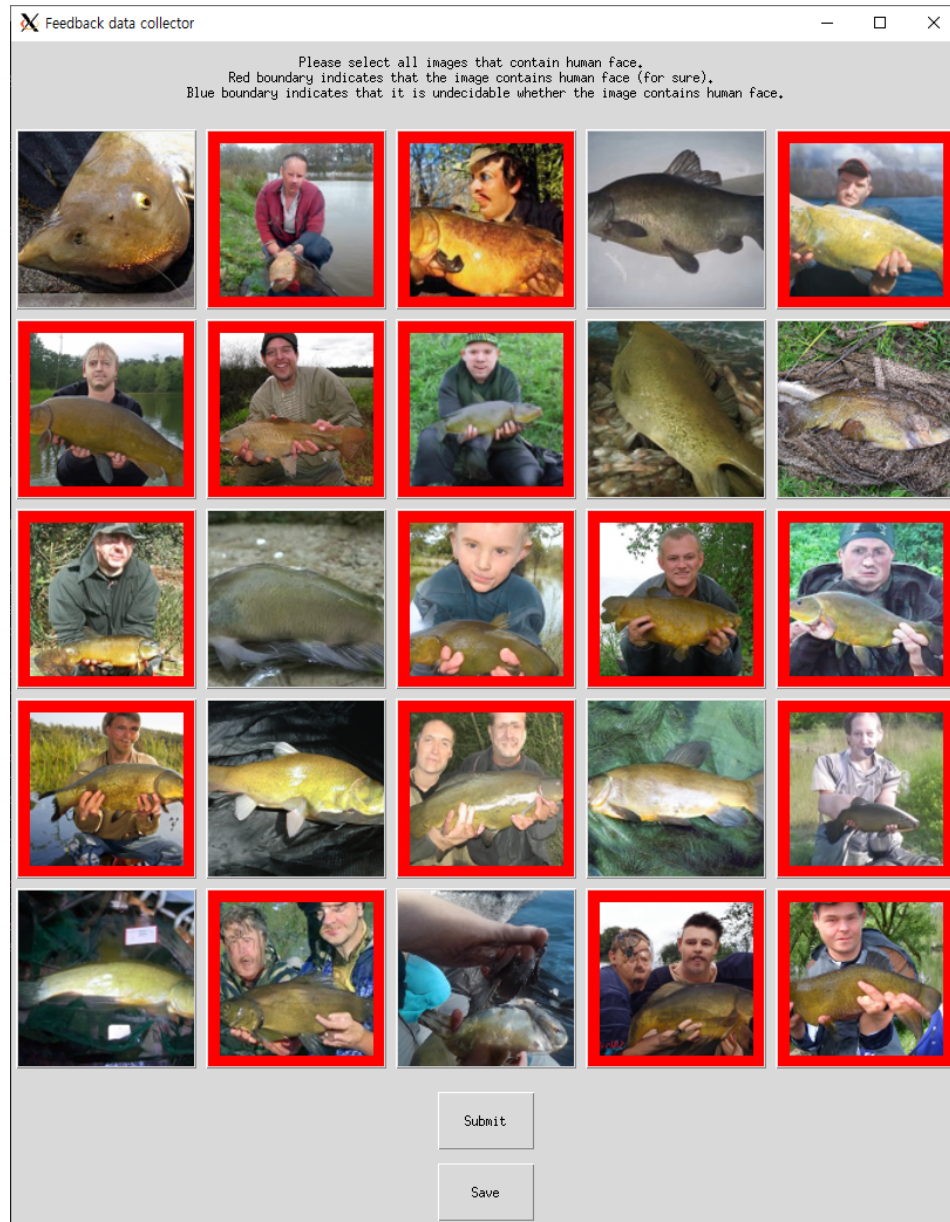

Figure 5: Simple GUI used to collect human feedback for the setup of Section 5.3. Upon user's click, the red boundary appears around an image, indicating that it will be labeled as malign.

## F Reward model: Further details

**Weighted loss function.** We train the reward model using the weighted binary cross entropy loss

$$BCE_\alpha(r_\psi(x; t), y) = -\alpha \cdot y \log r_\psi(x; t) - (1 - y) \log(1 - r_\psi(x; t)). \quad (4)$$

We use  $\alpha < 1$  to prioritize the model to accurately classify malign images as malign at the expense of potentially misclassifying some benign images as malign.

**Data augmentation.** We augment the training dataset with 10 to 20 random variations of each training image using rotation, horizontal flip, crop, and color jitter. We augment the data once and train the reward model to fit this augmented data as opposed to applying a random augmentation every time the data is loaded.

**Bootstrap subsampling.** As discussed in Section 3.1, we use the reward model ensemble in the benign-dominant setup, where labeled benign images are more plentiful while there is a relatively limited quantity of  $N_m$  malign images. The  $K$  reward models of the ensemble utilize the same set of  $N_m$  malign images. As for the benign images, we implement a resampling strategy that is inspired by bootstrapping [14, 15, 13]. Each model selects  $N_m$  benign images independently with replacement from the pool of labeled benign images.

## G Backward guidance and recurrence

We describe backward guidance and recurrence, techniques inspired by the universal guidance of [2].

### G.1 Backward guidance

Compute  $\hat{\varepsilon}_\theta(\bar{X}_t, t)$  as in (2) or (3) (time-independent or time-dependent guidance) and form

$$\hat{X}_0^{\text{fwd}} = \frac{\bar{X}_t - \sqrt{1 - \alpha_t} \hat{\varepsilon}_\theta(\bar{X}_t, t)}{\sqrt{\alpha_t}}.$$

We then take  $\hat{X}_0^{\text{fwd}}$  as a starting point and perform  $B$  steps of gradient ascent with respect to  $\log r_\psi(\cdot)$  and obtain  $\hat{X}_0^{\text{bwd}}$ . Finally, we replace  $\hat{\varepsilon}_\theta$  by  $\varepsilon_\theta^{\text{bwd}}$  such that  $\bar{X}_t = \sqrt{\alpha_t} \hat{X}_0^{\text{bwd}} + \sqrt{1 - \alpha_t} \varepsilon_\theta^{\text{bwd}}(\bar{X}_t, t)$  holds, i.e.,

$$\varepsilon_\theta^{\text{bwd}}(\bar{X}_t, t) = \frac{1}{\sqrt{1 - \alpha_t}} \left( \bar{X}_t - \sqrt{\alpha_t} \hat{X}_0^{\text{bwd}} \right).$$

### G.2 Recurrence

Once  $\varepsilon_\theta^{\text{bwd}}$  is computed, the guided sampling is implemented as a discretized step of the backward SDE

$$d\bar{X}_t = \beta_t \left( \frac{1}{\sqrt{1 - \alpha_t}} \varepsilon_\theta^{\text{bwd}}(\bar{X}_t, t) - \frac{1}{2} \bar{X}_t \right) dt + \sqrt{\beta_t} d\bar{W}_t.$$

Say the discretization step-size is  $\Delta t$ , so the update computes  $\bar{X}_{t-\Delta t}$  from  $\bar{X}_t$ . In recurrent generation, we use the notation  $\bar{X}_t^{(1)} = \bar{X}_t$  and  $\bar{X}_{t-\Delta t}^{(1)} = \bar{X}_{t-\Delta t}$  and then obtain  $\bar{X}_t^{(2)}$  by following the forward noise process of the (discretized) VP SDE (1) starting from  $\bar{X}_{t-\Delta t}^{(1)}$  for time  $\Delta t$ . We repeat the process  $R$  times, sequentially generating  $\bar{X}_{t-\Delta t}^{(1)}, \bar{X}_{t-\Delta t}^{(2)}, \dots, \bar{X}_{t-\Delta t}^{(R)}$ .

## 481 H MNIST crossed 7: Experiment details and image samples

### 482 H.1 Diffusion model

483 For this experiment, we train our own diffusion model. We use the 5,000 images of the digit “7” from  
484 the MNIST training set and rescale them to  $32 \times 32$  resolution. The architecture of the error network  
485  $\varepsilon_\theta$  follows the UNet implementation<sup>6</sup> of a prior work [12], featuring a composition of residual blocks  
486 with downsampling and upsampling convolutions and global attention layers, and time embedding  
487 injected into each residual block. We set the input and output channel size of the initial convolutional  
488 layer to 1 and 128, respectively, use channel multipliers [1, 2, 2, 2] for residual blocks at subsequent  
489 resolutions, and use 3 residual blocks for each resolution. We train the diffusion model for 100,000  
490 iterations using the AdamW [27] optimizer with  $\beta_1 = 0.9$  and  $\beta_2 = 0.999$ , using learning rate  $10^{-4}$ ,  
491 EMA with rate 0.9999 and batch size 256.

### 492 H.2 Reward model and training

493 The time-dependent reward model architecture is a half-UNet model with the upsampling blocks  
494 replaced with attention pooling to produce a scalar output. The weights are randomly initialized, i.e.,  
495 we do not use transfer learning. We augment the training (human feedback) data with random rotation  
496 in  $[-20, 20]$  degrees. When using 10 malign and 10 benign feedback data, we use  $\alpha = 0.02$  for the  
497 training loss  $BCE_\alpha$  and train all reward models for 1,000 iterations using AdamW with learning rate  
498  $3 \times 10^{-4}$ , weight decay 0.05, and batch size 128. When we use 10 malign and 50 benign data for the  
499 ablation study, we use  $\alpha = 0.005$  and train for the same number of epochs as used in the training of  
500 10 malign & 10 benign case, while using the same batch size 128.

### 501 H.3 Sampling and ablation study

502 For sampling via reward ensemble without backward guidance and recurrence, we choose  $\omega = 1.0$ .  
503 We compare the censoring performance of a reward model ensemble with two non-ensemble reward  
504 models called “**Single**” and “**Union**” in Figure 2a:

- 505 • “**Single**” model refers to one of the five reward models for the ensemble method, which is trained  
506 on randomly selected 10 malign images, and a set of 10 benign images.
- 507 • “**Union**” model refers to a model which is trained on 10 malign images and a collection of 50  
508 benign images, combining the set of benign images used to train the ensemble. This model is  
509 trained for 3,000 iterations, with  $\alpha = 0.005$  for the  $BCE_\alpha$  loss.

510 For these non-ensemble models, we use  $\omega = 5.0$ , which is  $K = 5$  times the guidance weight used in  
511 the ensemble case. For censored image generation using ensemble combined with backward guidance  
512 and recurrence as discussed in Section G, we use  $\omega = 1.0$ , learning rate 0.001,  $B = 5$ , and  $R = 4$ .

### 513 H.4 Censored generation samples

514 Figure 6 shows uncensored, baseline generation. Figures 7 and 8 shows images sampled with  
515 censored generation without and with backward guidance and recurrence.

---

<sup>6</sup><https://github.com/openai/guided-diffusion>

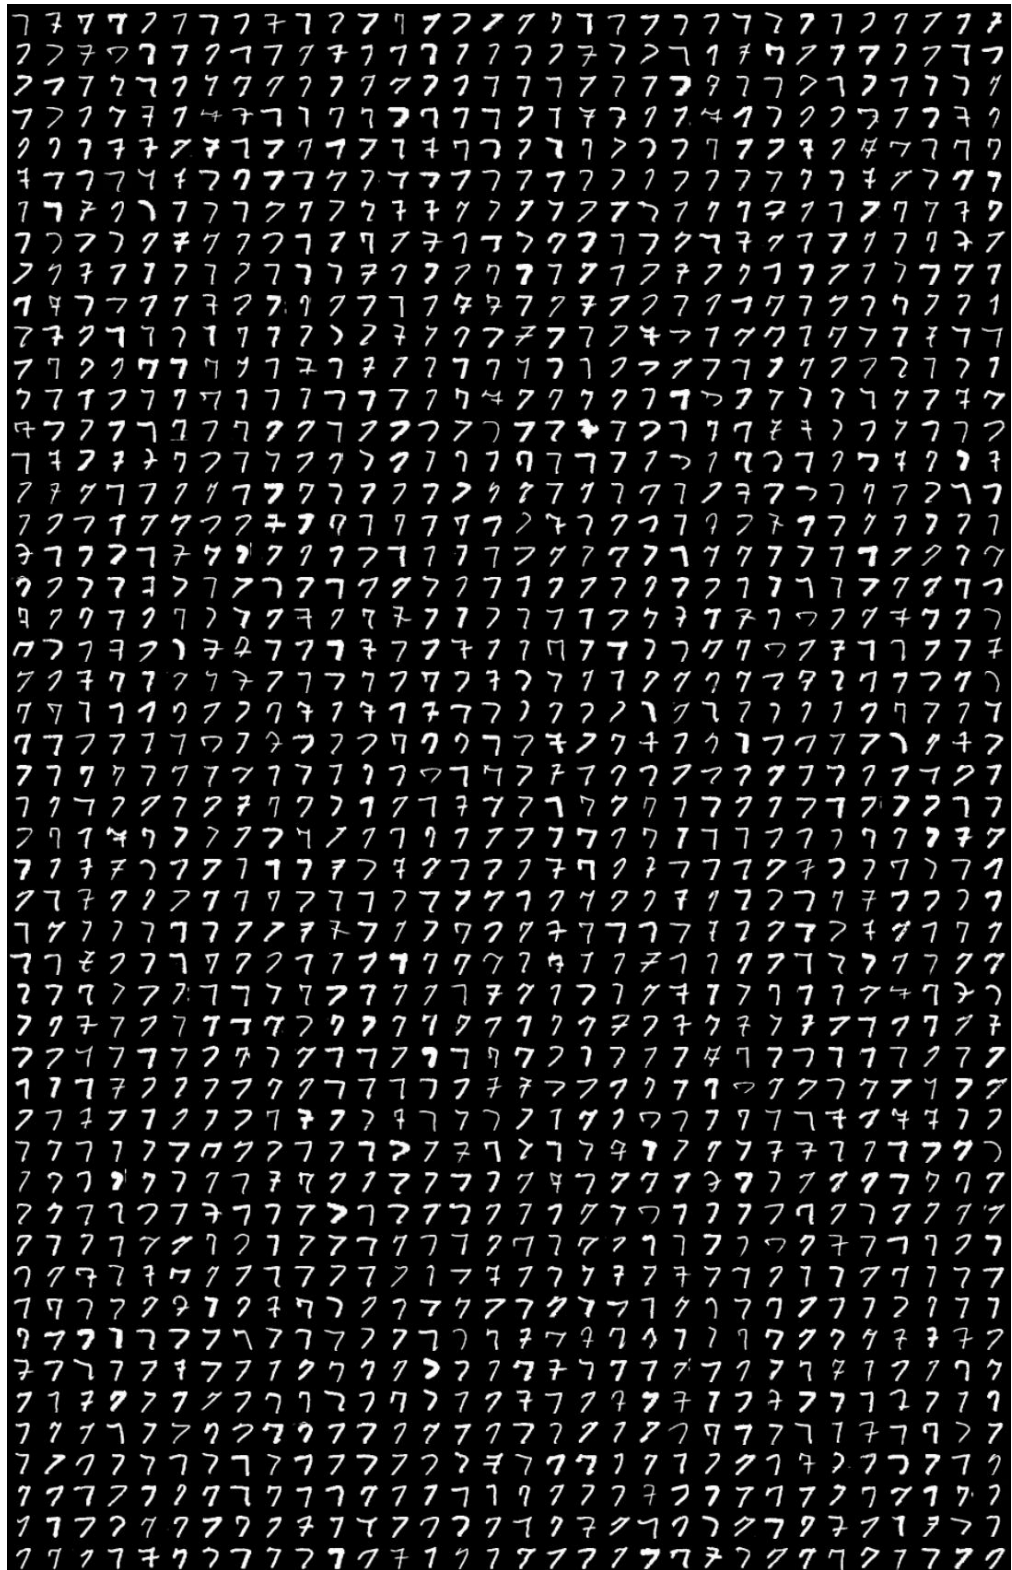

Figure 6: Uncensored baseline image samples from the diffusion model trained using only images of the digit “7” from MNIST.

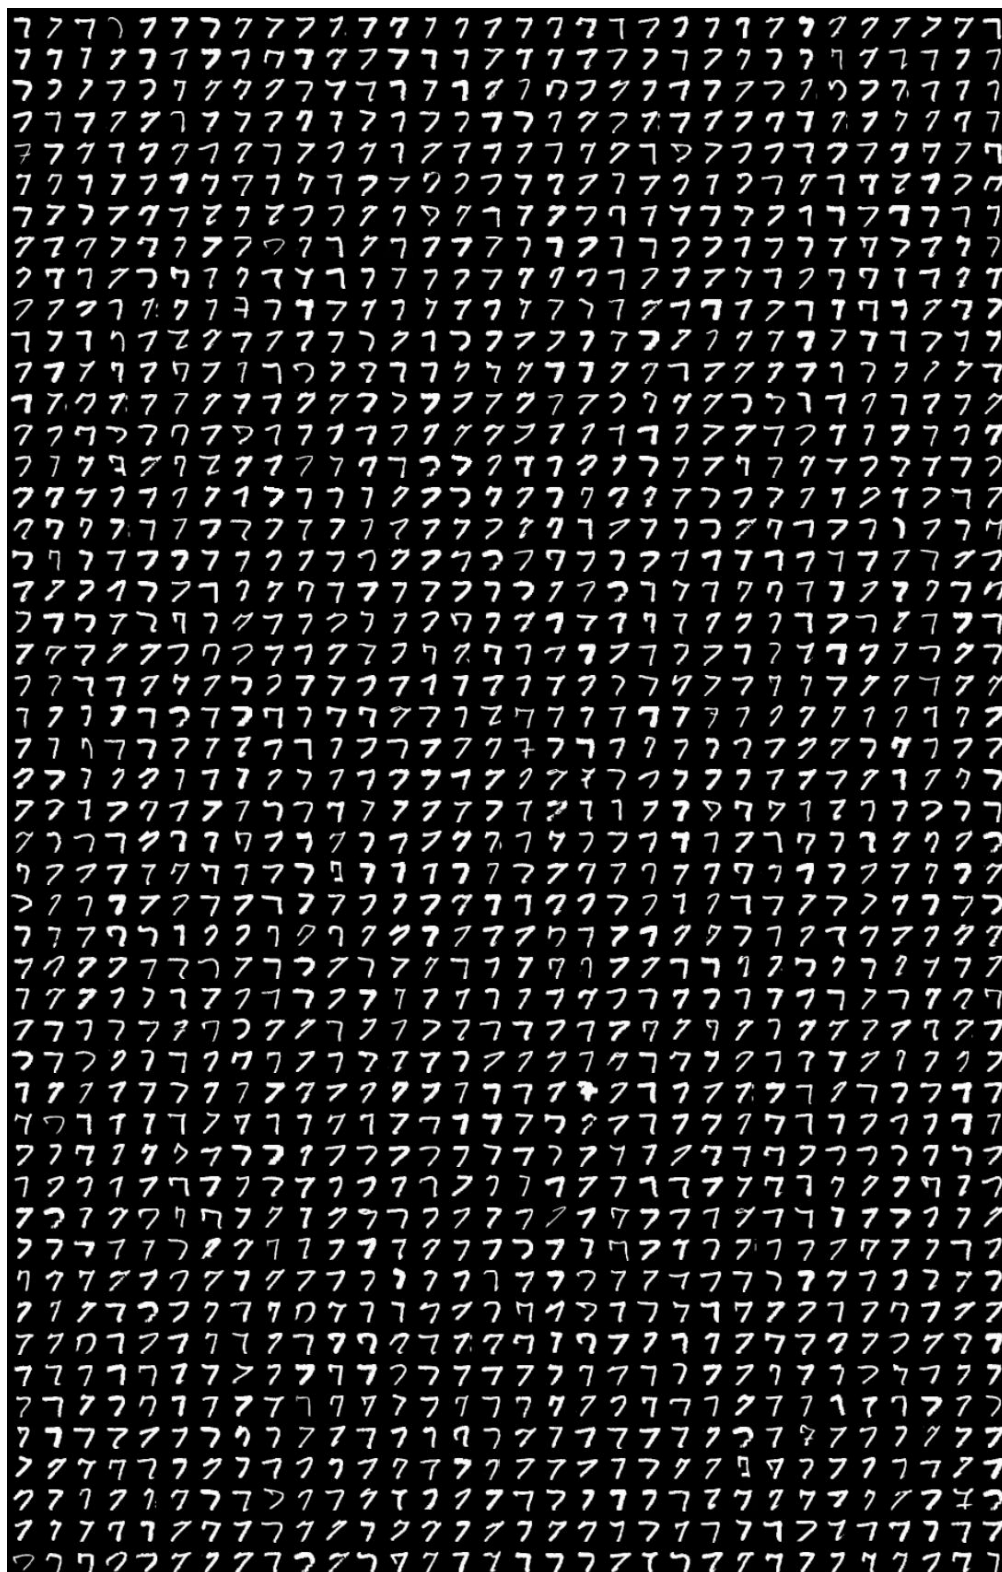

Figure 7: Non-curated censored generation samples without backward guidance and recurrence. Reward model ensemble is trained on 10 malign images.



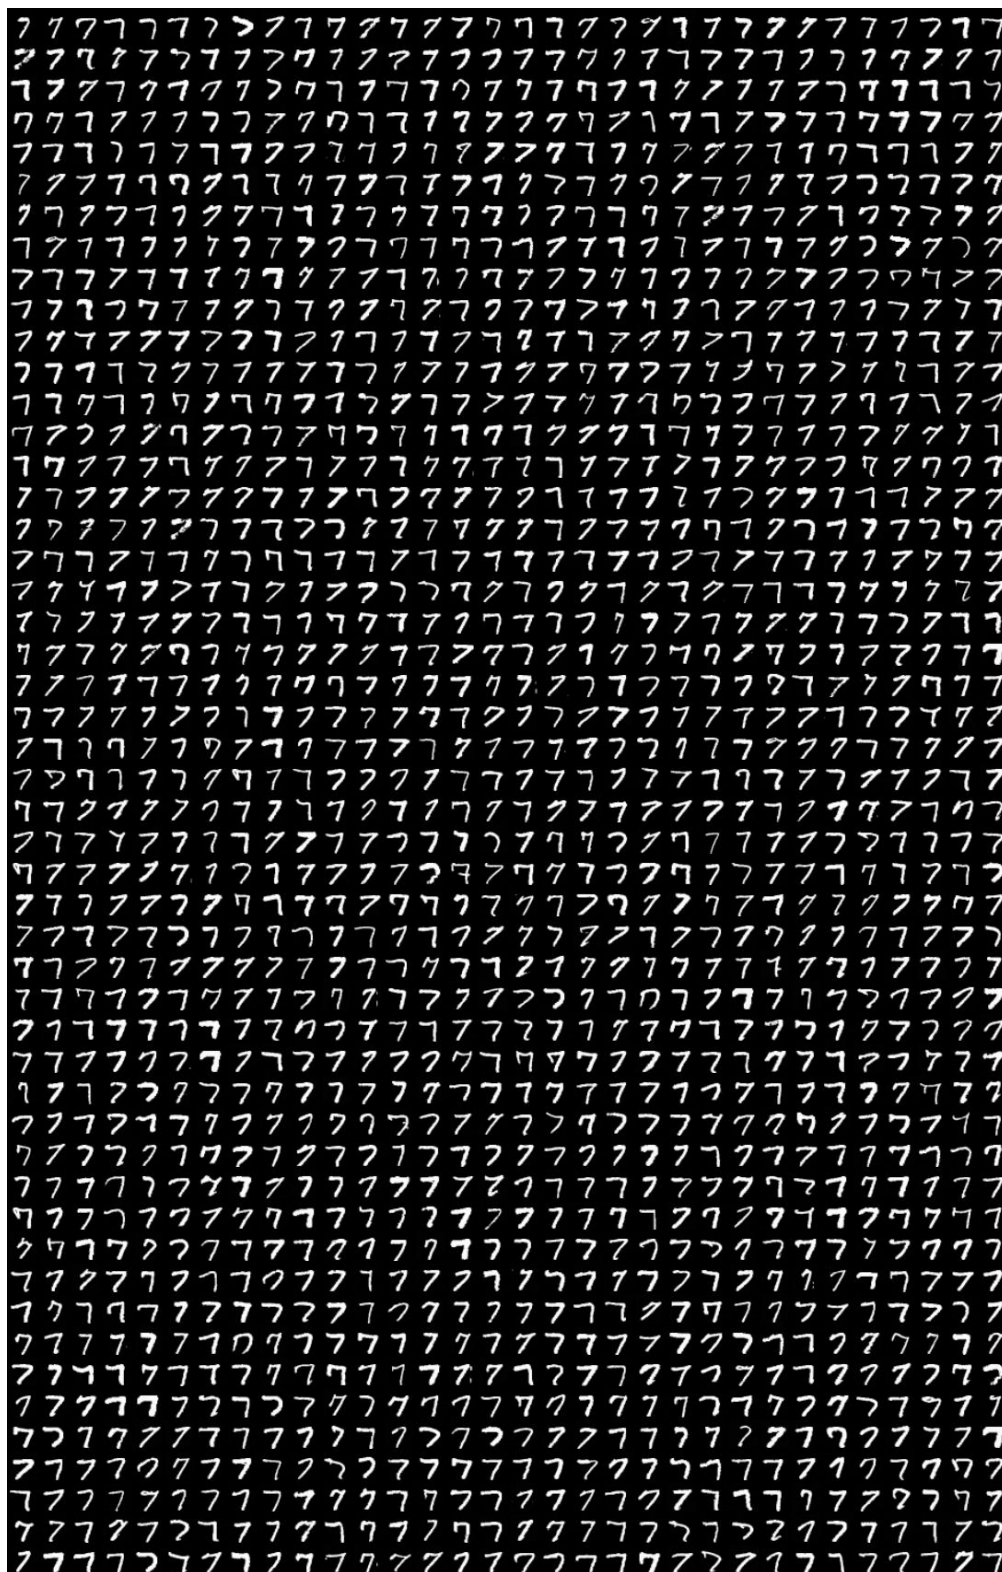

Figure 8: Non-curated censored generation samples **with** backward guidance and recurrence. Reward model ensemble is trained on 10 malign images.

## I LSUN church: Experiment details and image samples

### I.1 Pre-trained diffusion model

We use the pre-trained Latent Diffusion Model (LDM)<sup>7</sup> from [36]. We follow the original settings, which include using the same setting of 400 DDIM steps.

### I.2 Malign image definition

As shown in Figure 9, the “Shutterstock” watermark is composed of three elements: the Shutterstock logo in the center, the Shutterstock website address at the bottom, and a white X lines in the background. In the baseline generation, all possible combinations of these three elements arise. We classify an image as “malign” if it includes either the logo in the center or the website address at the bottom. We do not directly censor the white X lines, as they are often not clearly distinguishable when providing the human feedback. However, we do observe a reduction in the occurrence of the white X lines as they are indirectly censored due to their frequent co-occurrence with the other two elements of the Shutterstock watermark. While the majority of the watermarks are in the Shutterstock format, we did occasionally observe watermarks from other companies as well. We choose to censor only the Shutterstock watermarks as the other types were not sufficiently frequent.

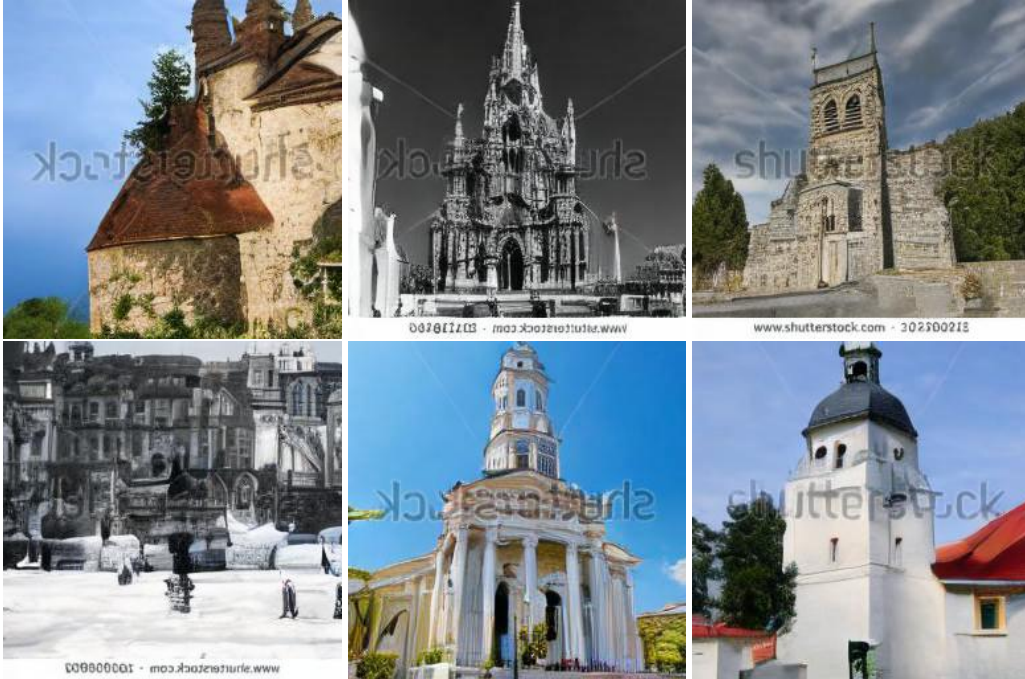

Figure 9: Examples of LSUN church images with Shutterstock watermarks.

### I.3 Reward model training

We utilize a ResNet18 architecture for the reward model, using the pre-trained weights available in torchvision.models’ “DEFAULTS” setting<sup>8</sup>, which is pre-trained in the ImageNet1k [10] dataset. We replace the final layer with a randomly initialized fully connected layer with a one-dimensional output. We train all layers of the reward model using the human feedback dataset of 60 images (30 malign, 30 benign) without data augmentation. We use  $BCE_{\alpha}$  in (4) as the training loss with  $\alpha = 0.1$ . The models are trained for 600 iterations using AdamW optimizer [27] with learning rate  $3 \times 10^{-4}$ , weight decay 0.05, and batch size 128.

<sup>7</sup><https://github.com/CompVis/latent-diffusion>

<sup>8</sup><https://pytorch.org/vision/main/models/generated/torchvision.models.resnet18>

#### 539 I.4 Sampling and ablation study

540 For sampling via reward ensemble without backward guidance and recurrence, we choose  $\omega = 2.0$ .  
541 We compare the censoring performance of a reward model ensemble with two non-ensemble reward  
542 models called “**Single**” and “**Union**” in Figure 2b:

- 543 • “**Single**” model refers to one of the five reward models for the ensemble method, which is trained  
544 on randomly selected 30 malign images, and a set of 30 benign images.
- 545 • “**Union**” model refers to a model which is trained on 30 malign images and a collection of 150  
546 benign images, combining the set of benign images used to train the ensemble. This model is  
547 trained for 1,800 iterations, with  $\alpha = 0.01$  for the  $BCE_\alpha$  loss.

548 For these non-ensemble models, we use  $\omega = 10.0$ , which is  $K = 5$  times the guidance weight used  
549 in the ensemble case. For censored image generation using ensemble combined with recurrence as  
550 discussed in Section G, we use  $\omega = 2.0$  and  $R = 4$ .

#### 551 I.5 Censored generation samples

552 Figure 10 shows uncensored, baseline generation. Figures 11 and 12 present images sampled with  
553 censored generation without and with backward guidance and recurrence.



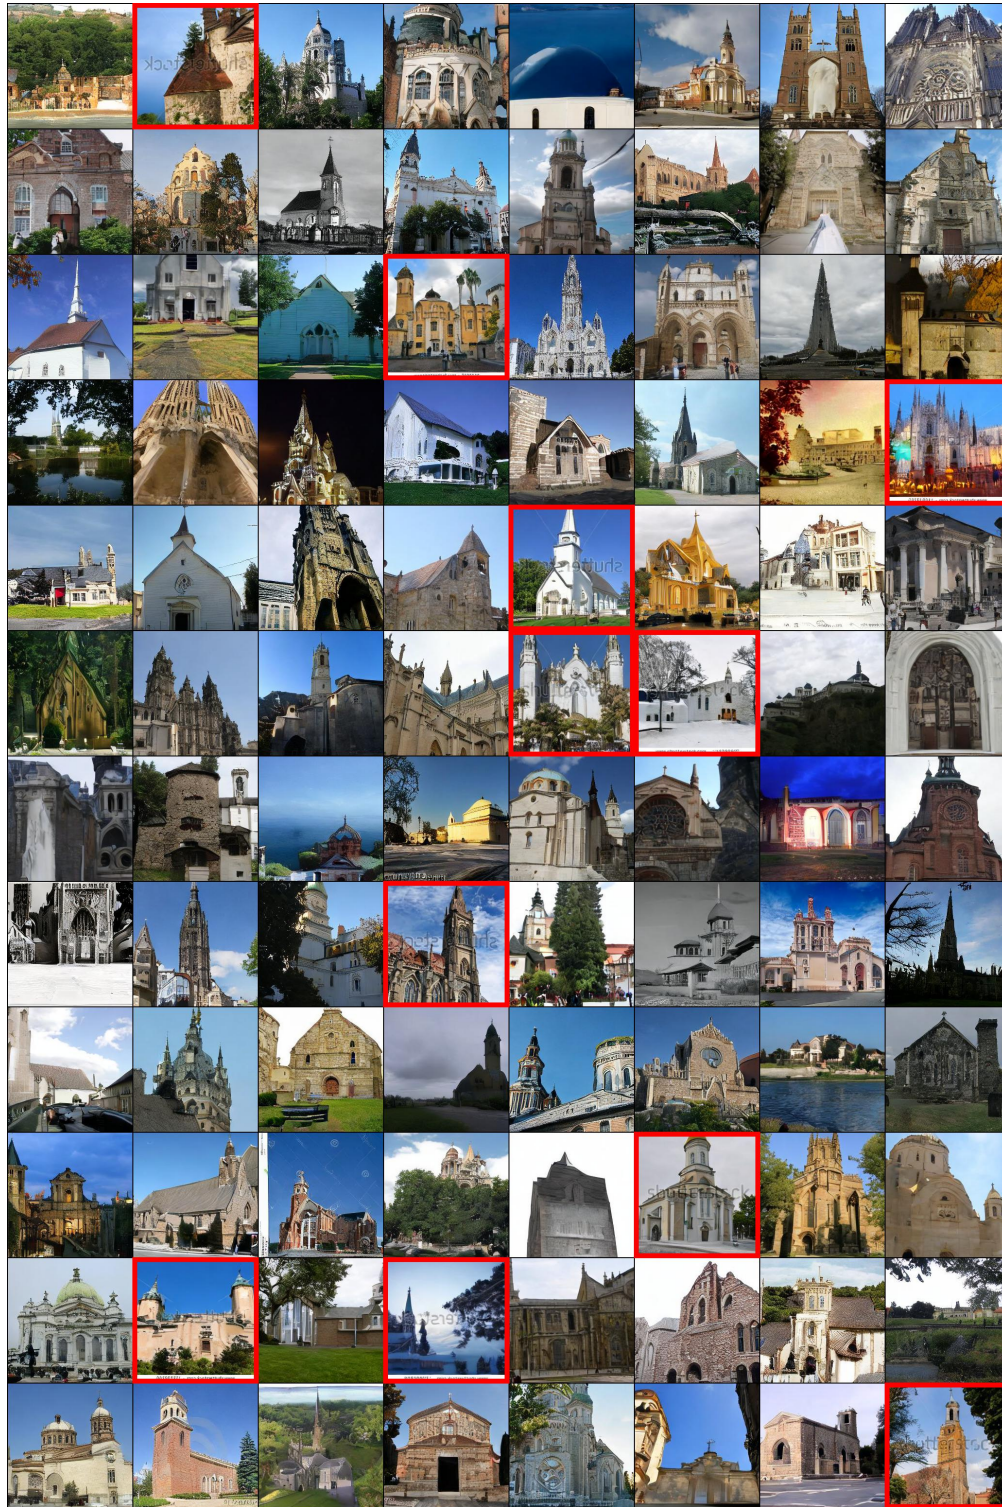

Figure 10: Uncensored baseline image samples. Malign images are labeled with red borders for visual clarity.



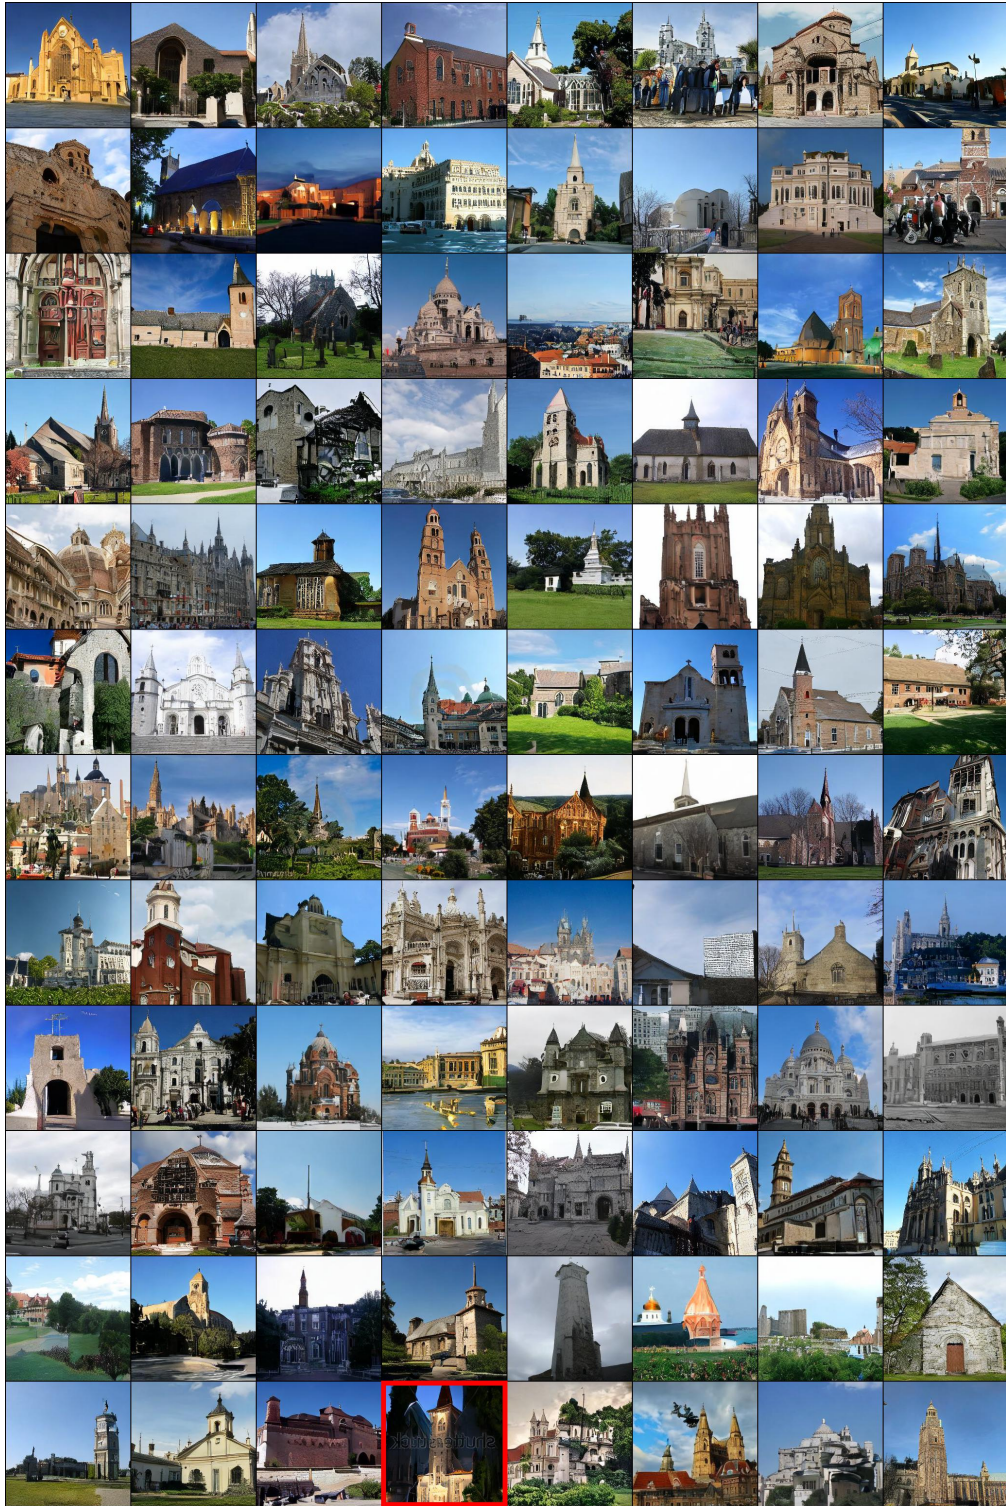

Figure 11: Non-curated censored generation samples without backward guidance and recurrence. Reward model ensemble is trained on 30 malign images. Malign images are labeled with red borders for visual clarity.



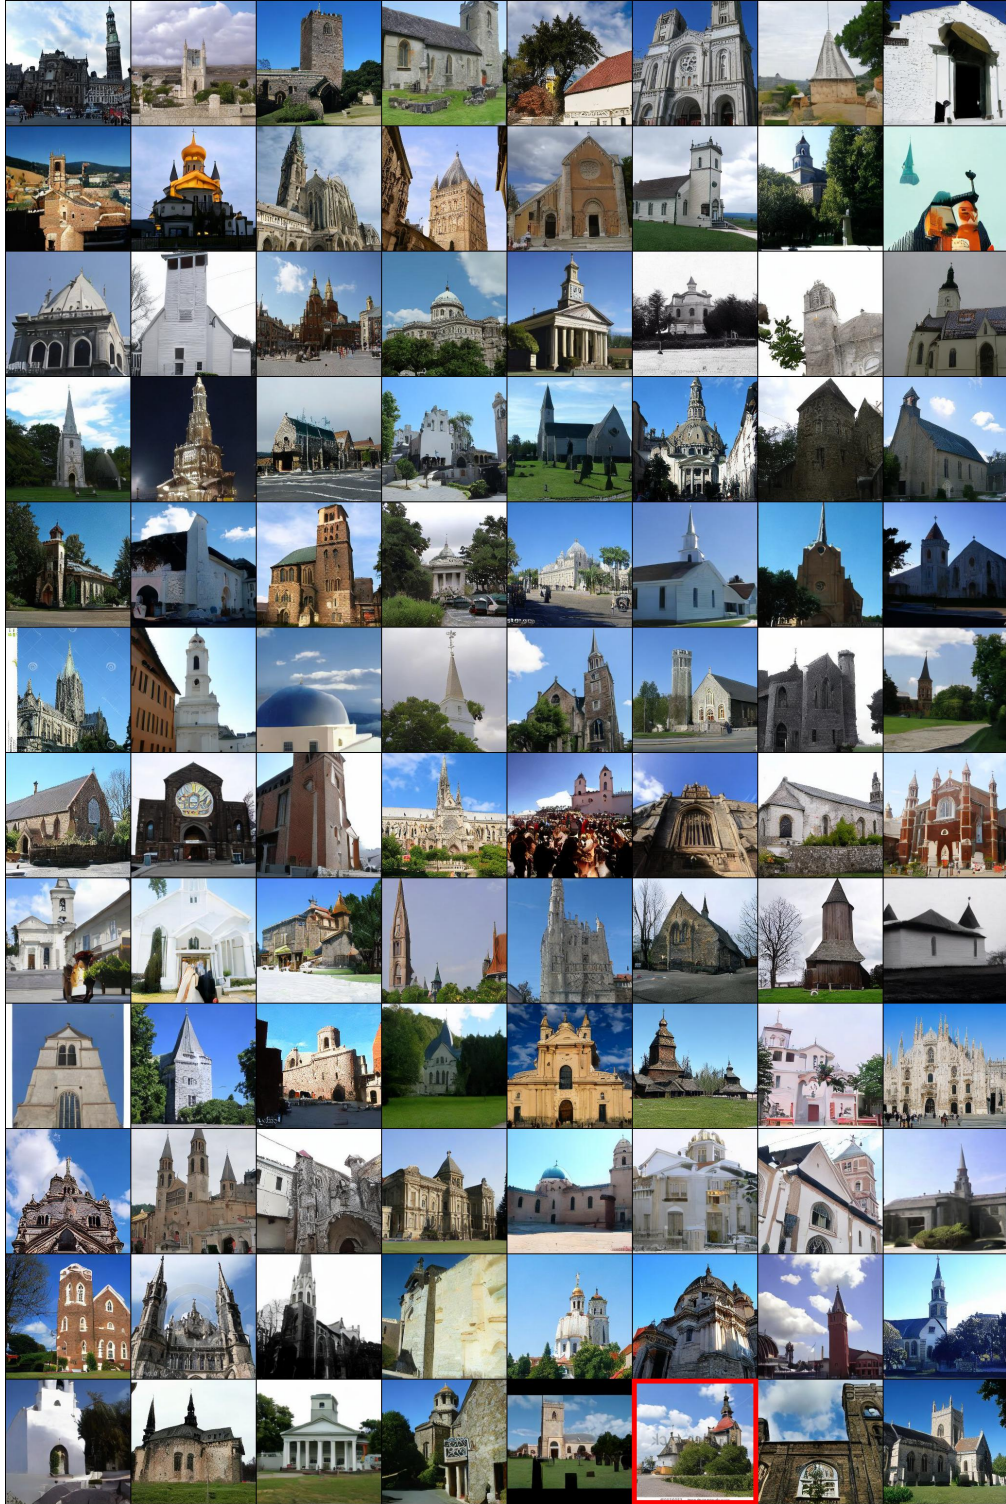

Figure 12: Non-curated censored generation samples **with** backward guidance and recurrence. Reward model ensemble is trained on 30 malign images. Malign images are labeled with red borders for visual clarity.

## 554 J ImageNet tench: Experiment details and image samples

### 555 J.1 Pre-trained diffusion model

556 We use the pre-trained diffusion model<sup>9</sup> from [12], trained on ImageNet1k dataset [10]. We use  
557 (time-dependent) classifier guidance with gradient scale 0.5 as recommended by [12] and 1,000  
558 DDPM steps for sampling to generate samples from the class “tench”.

### 559 J.2 Reward model training

560 We use same half-UNet architecture as in Section H for the time-dependent reward model. The  
561 weights are randomly initialized, i.e., we do not use transfer learning. All hyperparameters are set  
562 identical to the values used for training the time-dependent classifier for  $128 \times 128$  ImageNet in  
563 the prior work [12], except that we set the output dimension of the attention pooling layer to 1.  
564 We augment the training (human feedback) data with random horizontal flips with probability 0.5  
565 followed by one of the following transformations: **1)** random rotation within  $[-30, 30]$  degrees, **2)**  
566 random resized crop with an area of 75–100%, and **3)** color jitter with contrast range  $[0.75, 1.33]$  and  
567 hue range  $[-0.2, 0.2]$ . We use  $\alpha = 0.1$  for the training loss  $BCE_\alpha$ . When using 10 malign and 10  
568 benign feedback data, we train reward models for 500 iterations using AdamW with learning rate  
569  $3 \times 10^{-4}$ , weight decay 0.05, and batch size 128. For later rounds of imitation learning, we train for  
570 the same number of epochs while using the same batch size 128. In other words, we train for 1,000  
571 iterations for round 2 and 1,500 iterations for round 3.

### 572 J.3 Sampling and ablation study

573 For sampling without backward guidance and recurrence, we choose  $\omega = 5.0$ . We compare the  
574 censoring performance of a reward model trained with imitation learning with reward models  
575 trained without the multi-stage imitation learning in the ablation study. We train the non-imitation  
576 learning reward model for the same number of cumulative iterations with the corresponding case of  
577 comparison; for example, when training with 30 malign and 30 benign images from the baseline,  
578 we compare this with round 3 of imitation learning, so we train for 3,000 iterations, which equals  
579 the total sum of 500, 1,000 and 1,500 training iterations used in rounds 1, 2, and 3. For censored  
580 image generation via backward guidance and recurrence as discussed in Section G, we use  $\omega = 5.0$ ,  
581 learning rate 0.01,  $B = 5$ , and  $R = 4$ .

### 582 J.4 Censored generation samples

583 Figure 13 shows uncensored, baseline generation. Figures 14 and 15 present images sampled with  
584 censored generation without and with backward guidance and recurrence.

---

<sup>9</sup><https://github.com/openai/guided-diffusion>



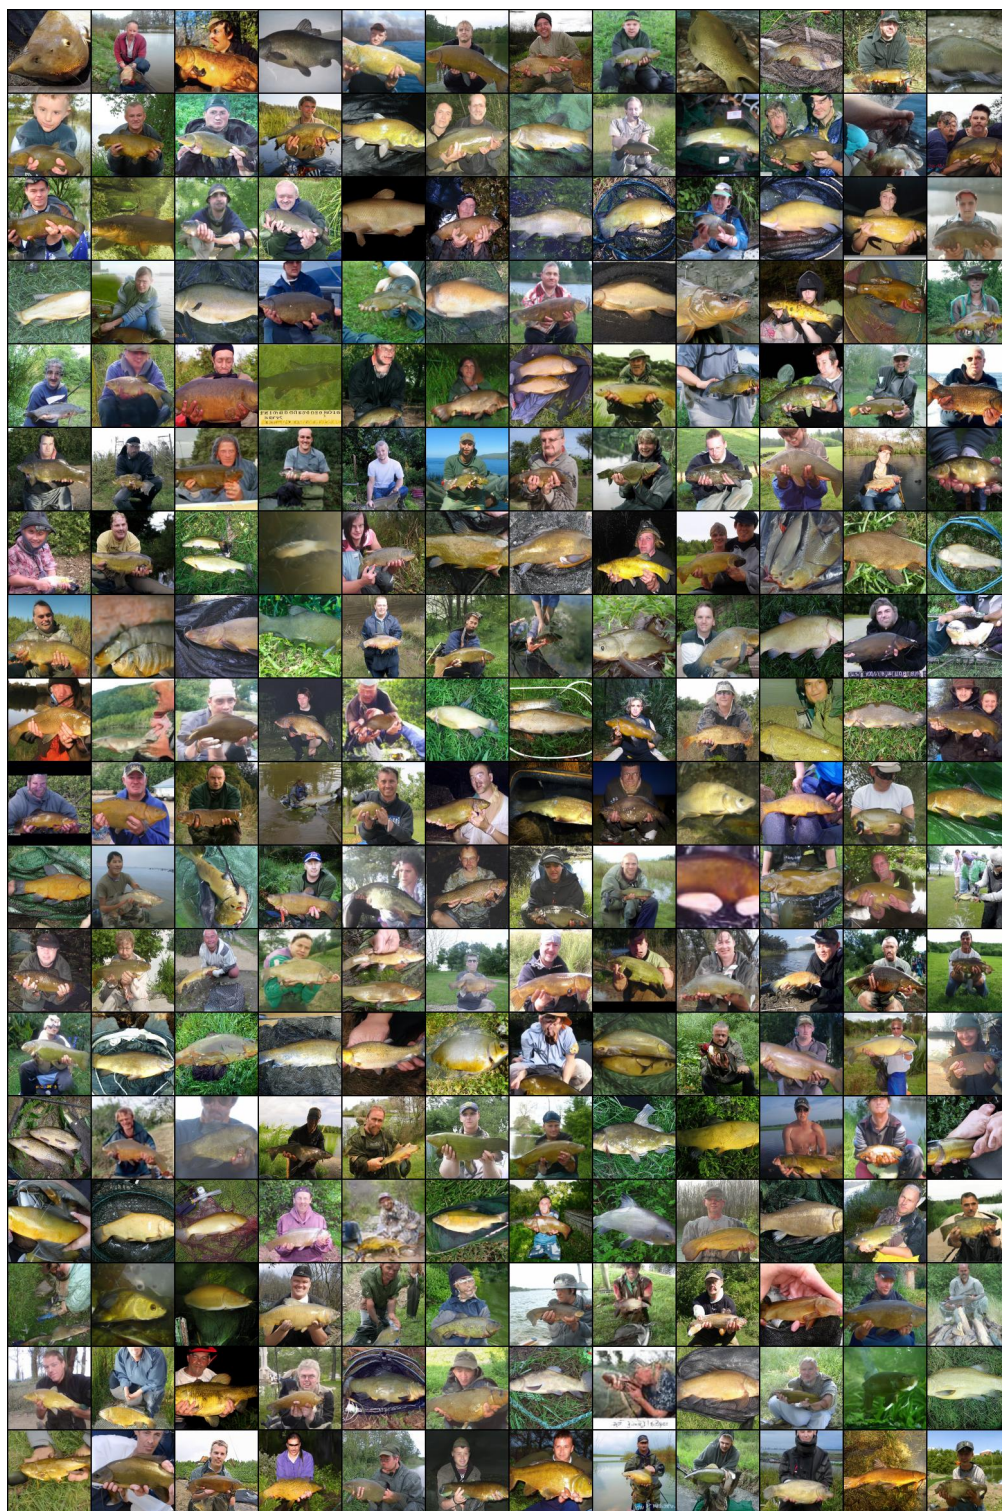

Figure 13: Uncensored baseline image samples.



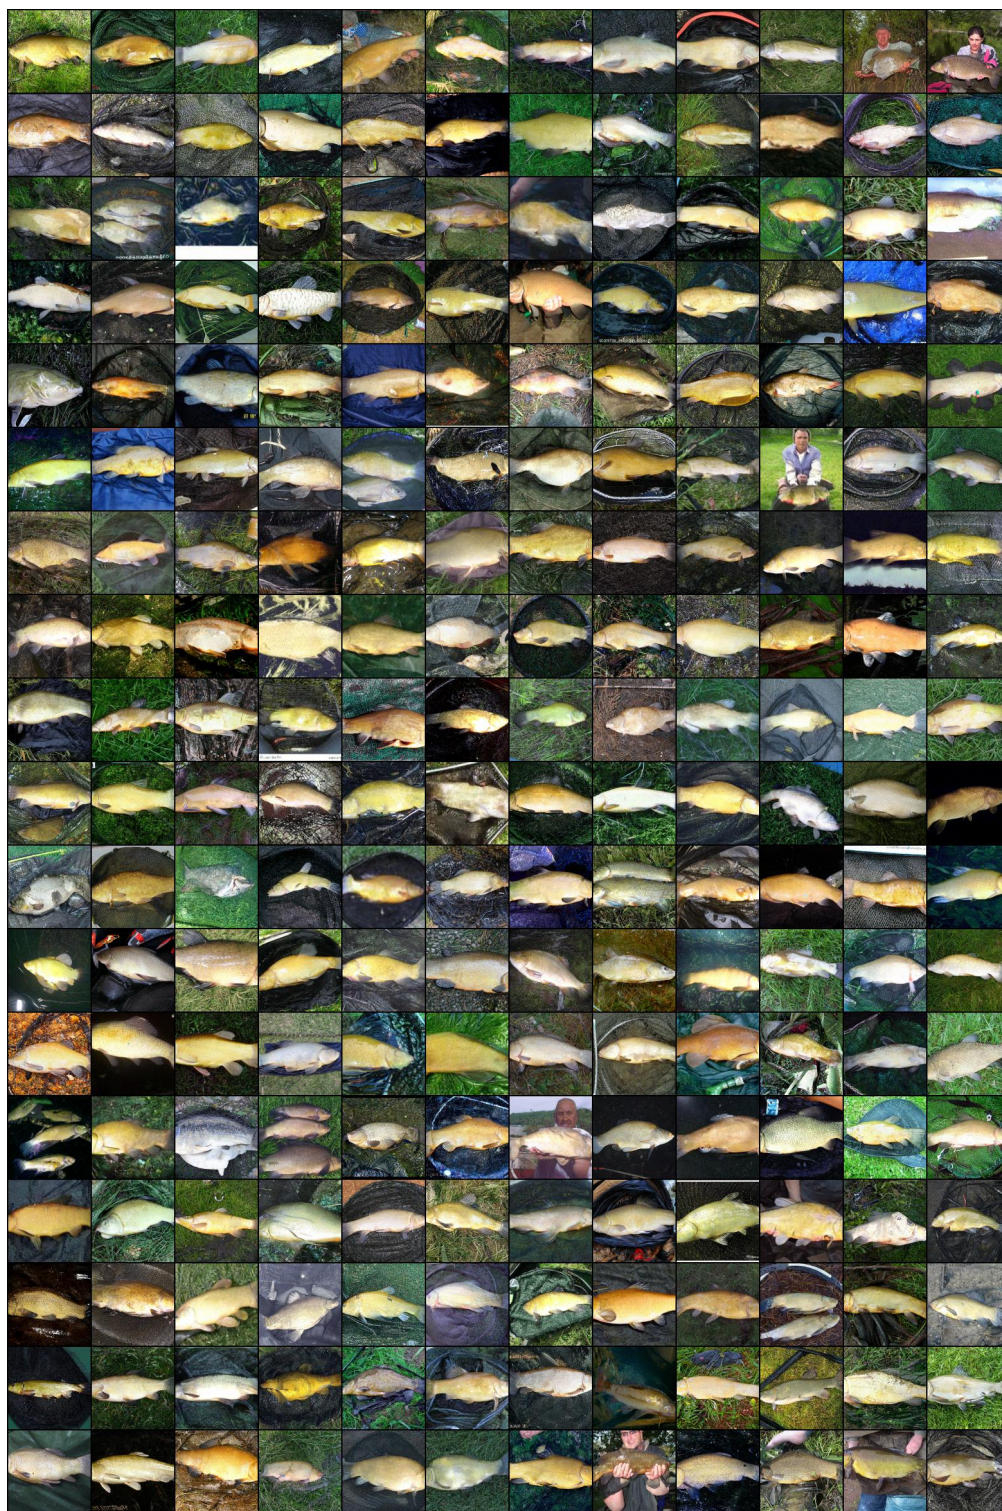

Figure 14: Non-curated censored generation samples without backward guidance and recurrence after using 3 rounds of imitation learning each using 10 malign and 10 benign labeled images.



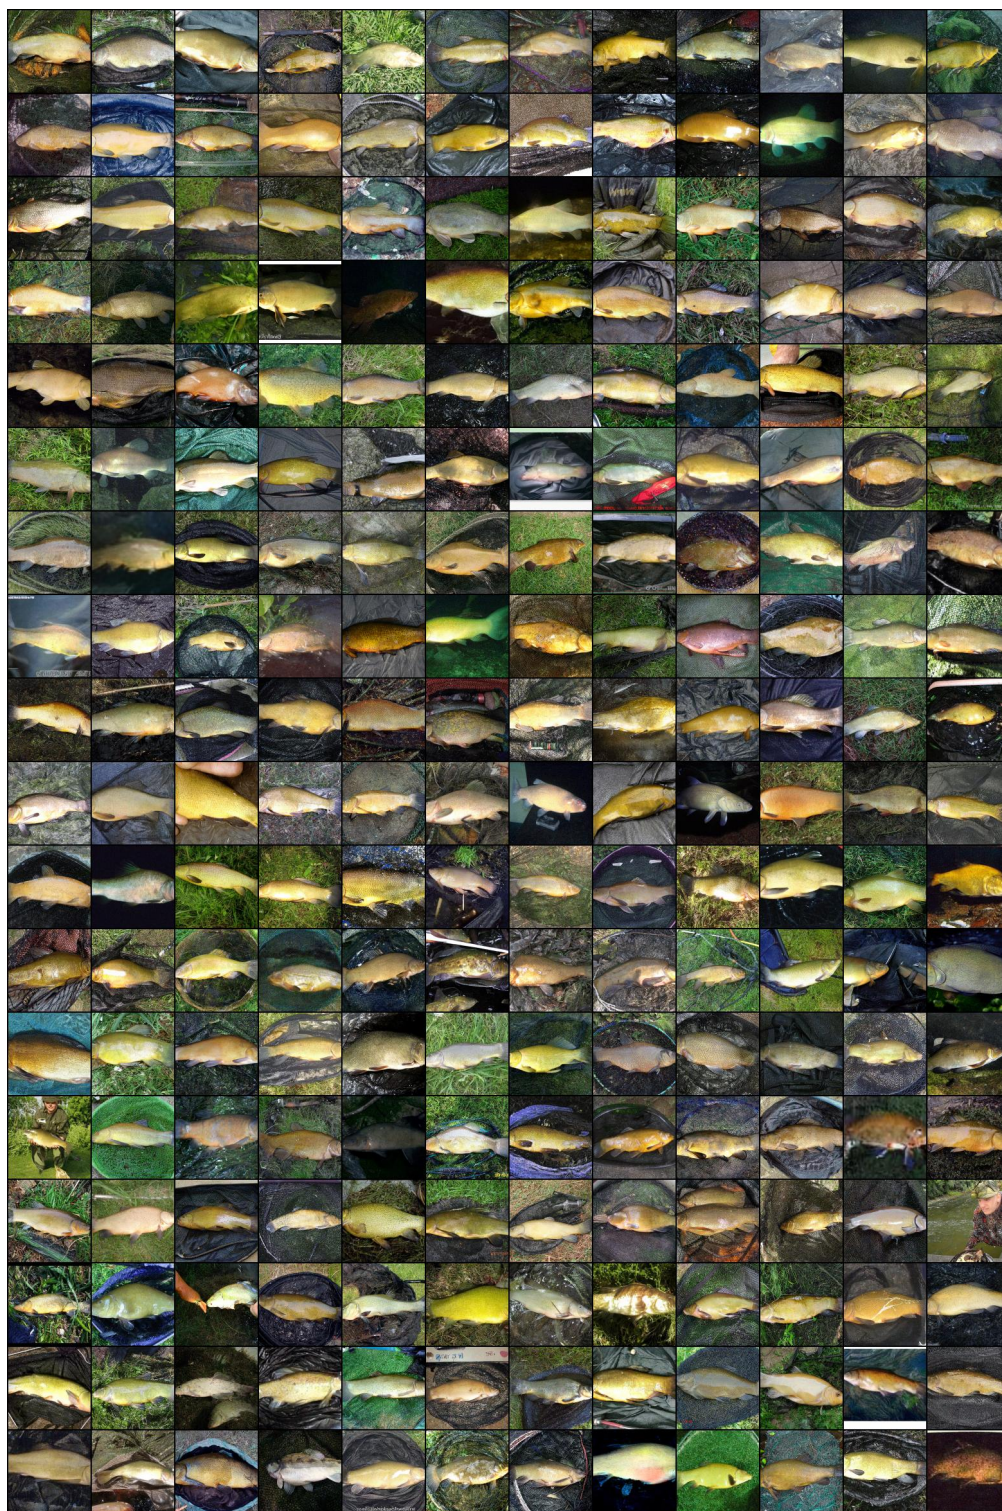

Figure 15: Non-curated censored generation samples **with** backward guidance and recurrence after using 3 rounds of imitation learning each using 10 malign and 10 benign labeled images.

## 585 **K LSUN bedroom: Experiment details and image samples**

### 586 **K.1 Pre-trained diffusion model**

587 We use the pre-trained diffusion model<sup>10</sup> from [12], trained on LSUN Bedroom dataset [46]. We  
588 follow the original settings, which include 1,000 DDPM steps, image size of  $256 \times 256$ , and linear  
589 noise scheduler.

### 590 **K.2 Malign image definition**

591 We classify an LSUN bedroom image as “broken” (malign) if it meets at least one of the following  
592 criteria:

- 593 (a) Obscured room layout: overall shape or layout of the room is not clearly visible;
- 594 (b) Distorted bed shape: bed does not present as a well-defined rectangular shape;
- 595 (c) Presence of distorted faces: there are distorted faces of humans or dogs;
- 596 (d) Distorted or crooked line: line of walls or ceilings are distorted or bent;
- 597 (e) Fragmented images: image is divided or fragmented in a manner that disrupts their logical  
598 continuity or coherence;
- 599 (f) Unrecognizable objects: there are objects whose shapes are difficult to identify;
- 600 (g) Excessive brightness: image is too bright or dark, thereby obscuring the forms of objects.

601 Figure 16 shows examples of the above.

602 On the other hand, we categorize images with the following qualities as benign, even if they may  
603 give the impression of being corrupted or damaged:

- 604 (a) Complex patterns: Images that include complex patterns in beddings or wallpapers;
- 605 (b) Physical inconsistencies: Images that are inconsistent with physical laws such as gravity or  
606 reflection;
- 607 (c) Distorted text: Images that contain distorted or unclear text.

608 Figure 17 shows examples of the above.

### 609 **K.3 Reward model training**

610 We utilize a ResNet18 architecture for the reward model, using the pre-trained weights available in  
611 torchvision.models’ “DEFAULTS” setting<sup>11</sup>, which is pre-trained in the ImageNet1k [10] dataset.  
612 We replace the final layer with a randomly initialized fully connected layer with a one-dimensional  
613 output. We train all layers of the reward model using the human feedback dataset of 200 images  
614 (100 malign, 100 benign) without data augmentation. We use  $BCE_\alpha$  in (4) as the training loss with  
615  $\alpha = 0.1$ . The models are trained for 5,000 iterations using AdamW optimizer [27] with learning rate  
616  $3 \times 10^{-4}$ , weight decay 0.05, and batch size 128. We train five reward models for the ensemble.

---

<sup>10</sup><https://github.com/openai/guided-diffusion>

<sup>11</sup><https://pytorch.org/vision/main/models/generated/torchvision.models.resnet18>



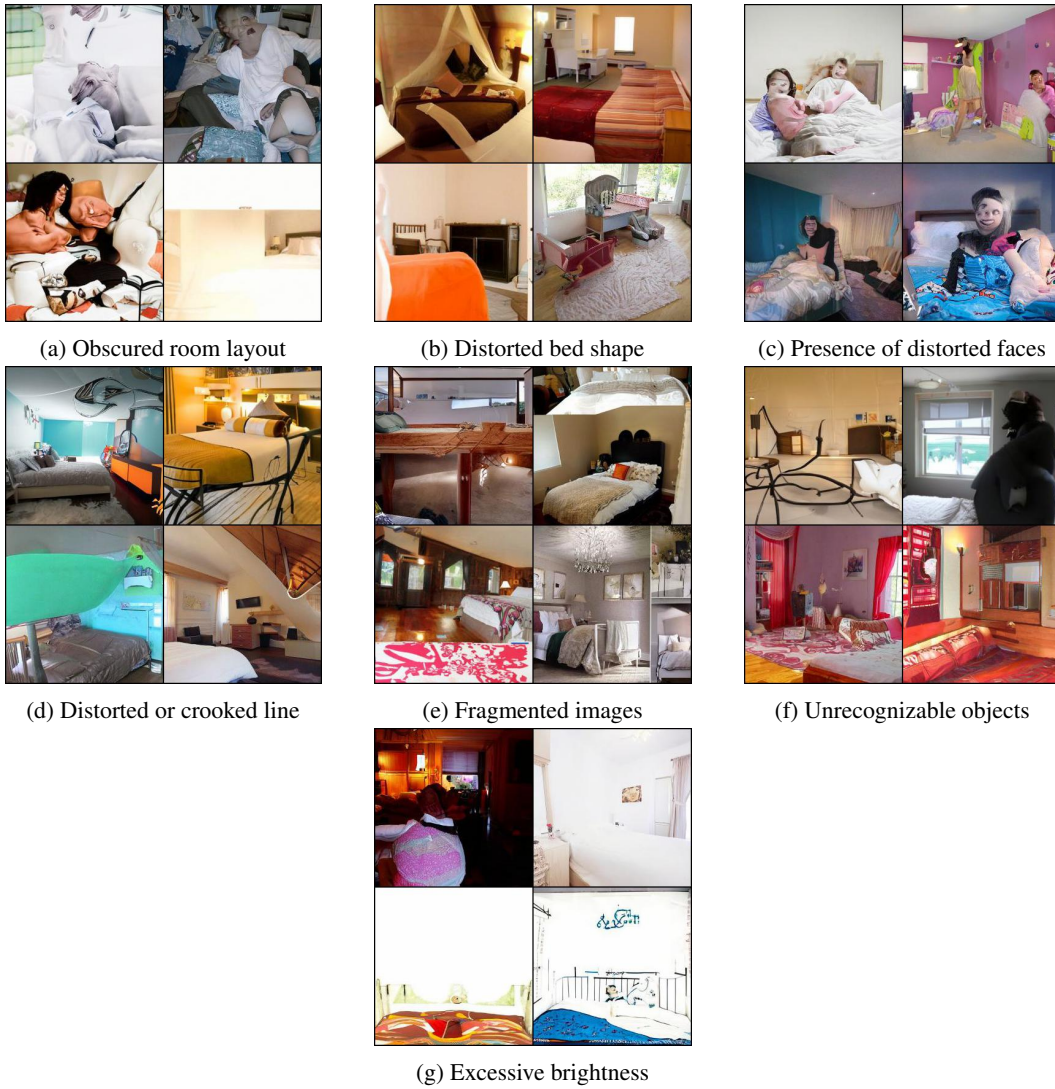

Figure 16: Examples of "broken" LSUN bedroom images

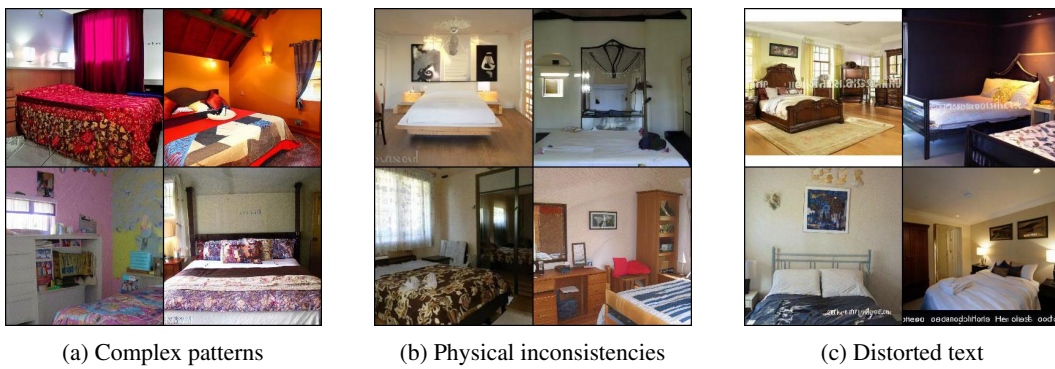

Figure 17: Images classified as benign despite giving the impression of being corrupted or damaged.



#### 617 **K.4 Sampling and ablation study**

618 For sampling via reward ensemble without backward guidance and recurrence, we choose  $\omega = 2.0$ .  
619 We compare the censoring performance of a reward model ensemble with two non-ensemble reward  
620 models called “**Single**” and “**Union**” in Figure 4:

- 621 • “**Single**” model refers to one of the five reward models for the ensemble method, which is trained  
622 on randomly selected 100 malign images, and a set of 100 benign images.
- 623 • “**Union**” model refers to a model which is trained on 100 malign images and a collection of 500  
624 benign images, combining the set of benign images used to train the ensemble. These models  
625 are trained for 15,000 iterations with  $\alpha = 0.02$  for the  $BCE_\alpha$  loss.

626 For these non-ensemble models, we use  $\omega = 10.0$ , which is  $K = 5$  times the guidance weight used in  
627 the ensemble case. For censored image generation using ensemble combined with backward guidance  
628 and recurrence as discussed in Section G, we use  $\omega = 2.0$ , learning rate 0.01,  $B = 5$ , and  $R = 4$ .

#### 629 **K.5 Censored generation samples**

630 Figure 18 shows uncensored, baseline generation. Figures 19–30 present a total of 1,000 images  
631 sampled with censored generation, 500 generated by ensemble reward models without backward  
632 guidance and recurrence and 500 with backward guidance and recurrence.

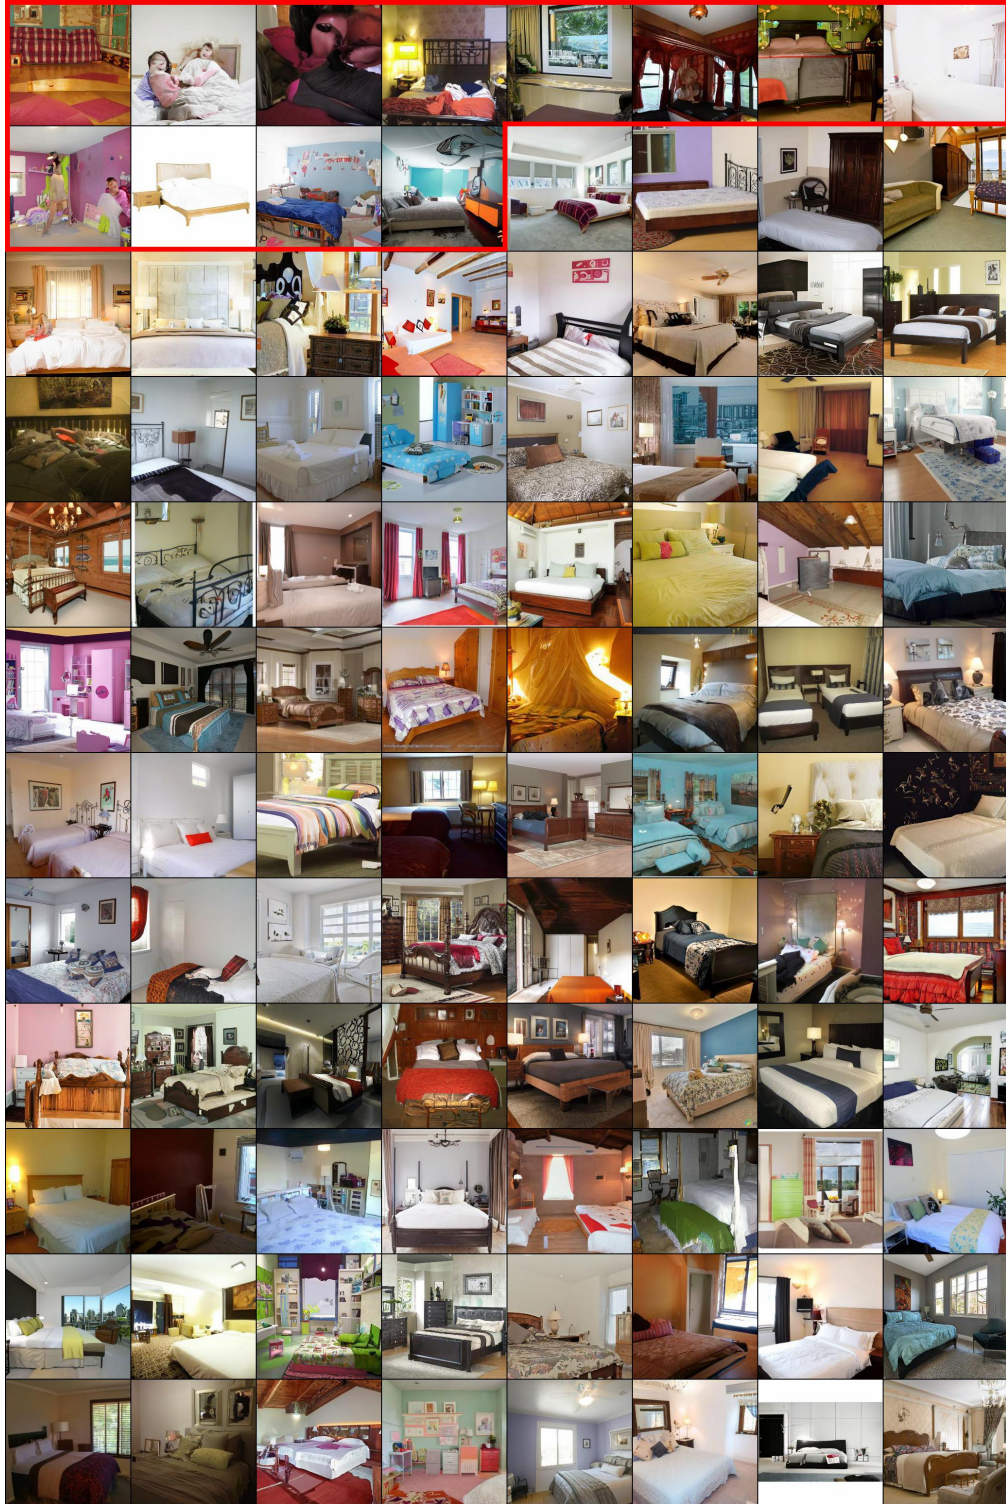

Figure 18: 96 uncensored baseline image samples. Malign images are labeled with red borders and positioned at the beginning for visual clarity.



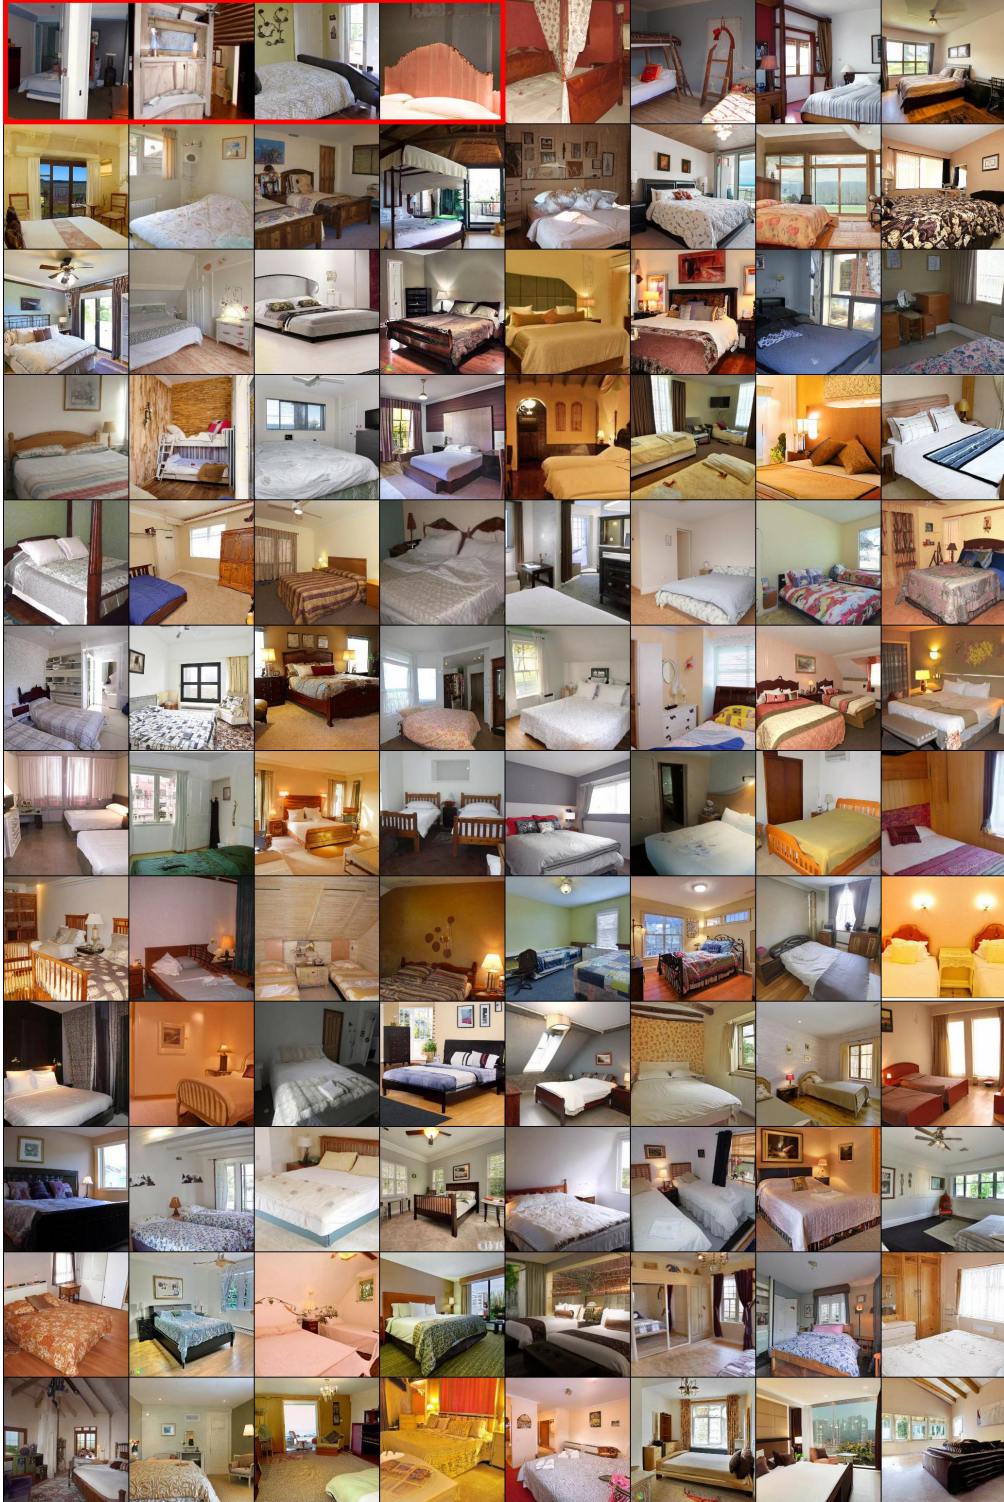

Figure 19: First set (1–96) of images among the 500 non-curated censored generation samples with a reward model ensemble and without backward guidance and recurrence. Malign images are labeled with red borders and positioned at the beginning for visual clarity. Qualitatively and subjectively speaking, we observe that censoring makes the malign images less severely “broken” compared to the malign images of the uncensored generation.



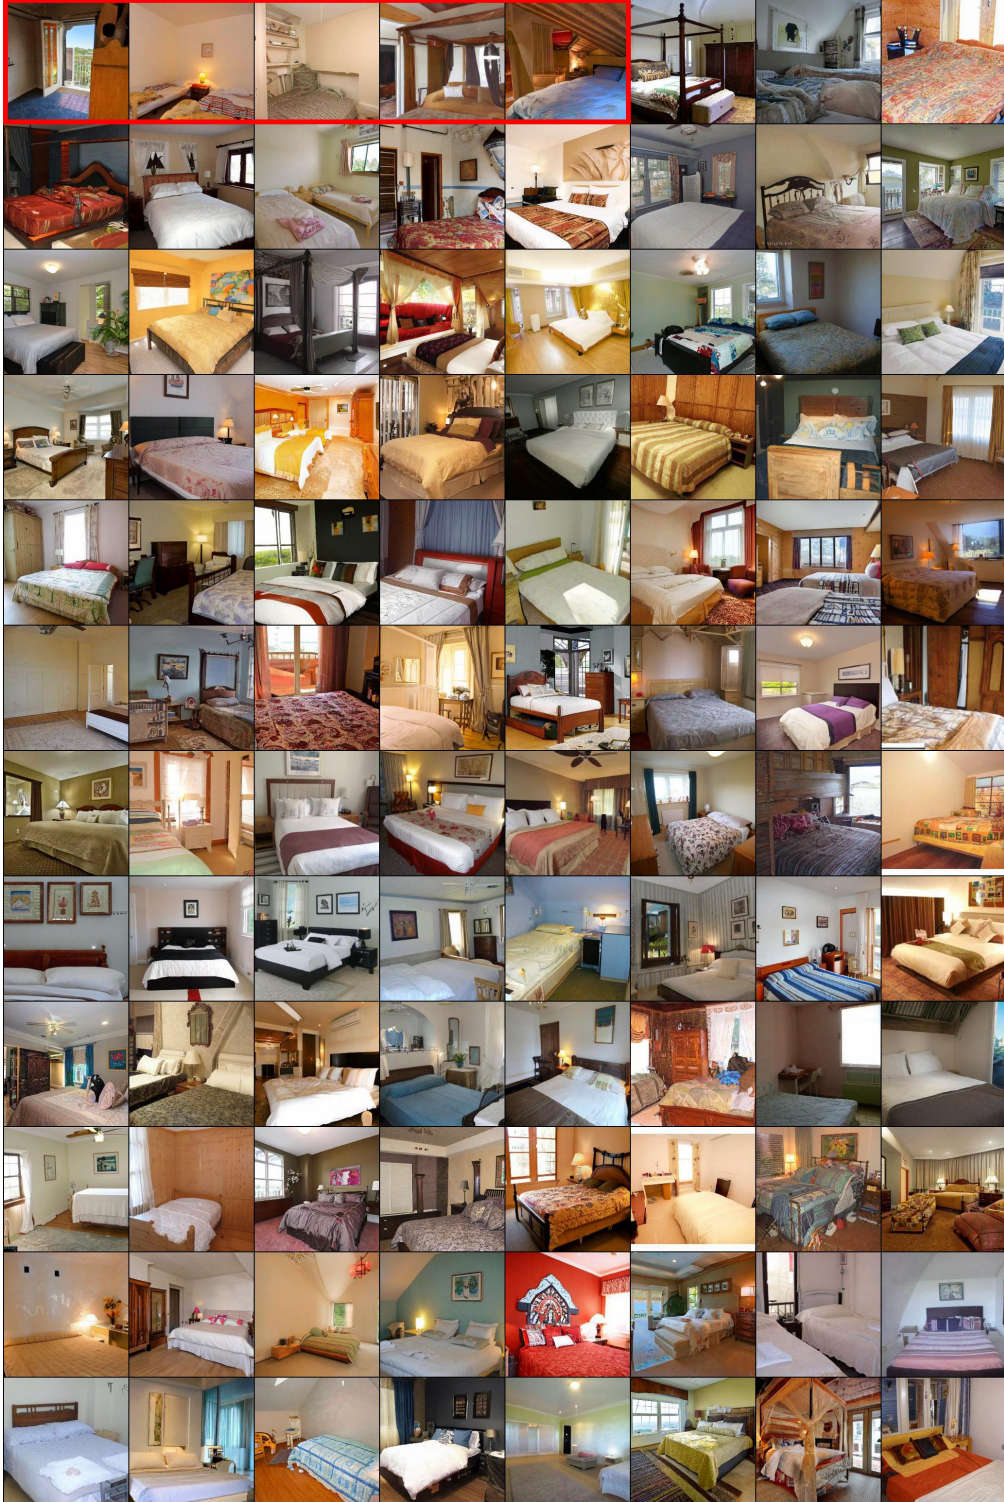

Figure 20: Second set (97–192) of images among the 500 non-curated censored generation samples with a reward model ensemble and without backward guidance and recurrence. Malign images are labeled with red borders and positioned at the beginning for visual clarity. Qualitatively and subjectively speaking, we observe that censoring makes the malign images less severely “broken” compared to the malign images of the uncensored generation.



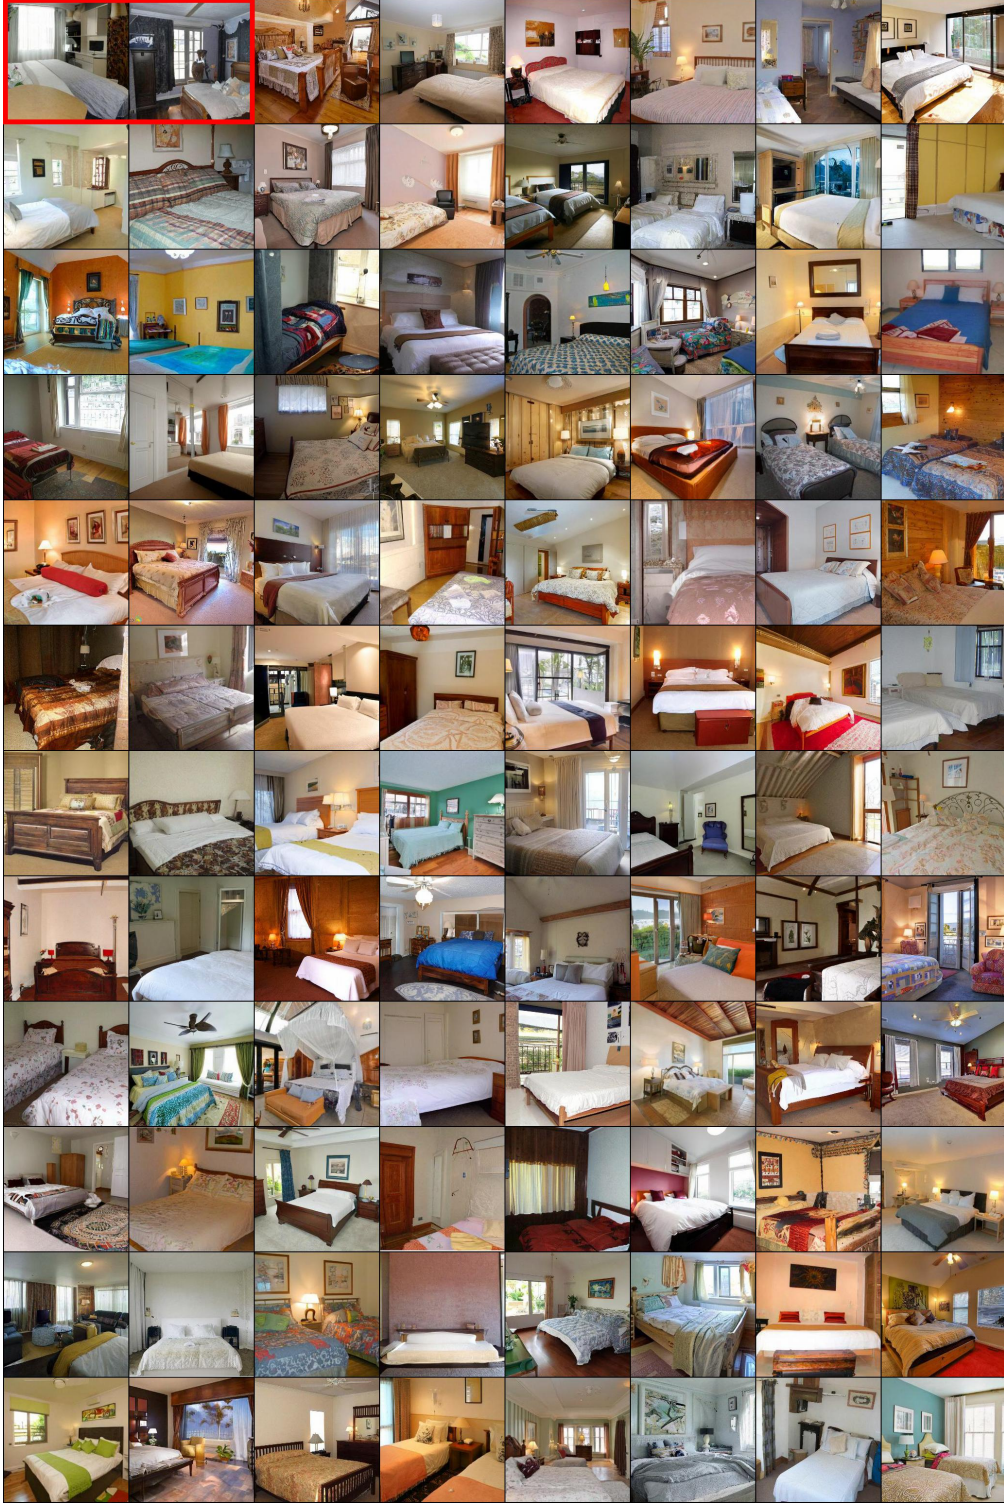

Figure 21: Third set (193–288) of images among the 500 non-curated censored generation samples with a reward model ensemble and without backward guidance and recurrence. Malign images are labeled with red borders and positioned at the beginning for visual clarity. Qualitatively and subjectively speaking, we observe that censoring makes the malign images less severely “broken” compared to the malign images of the uncensored generation.



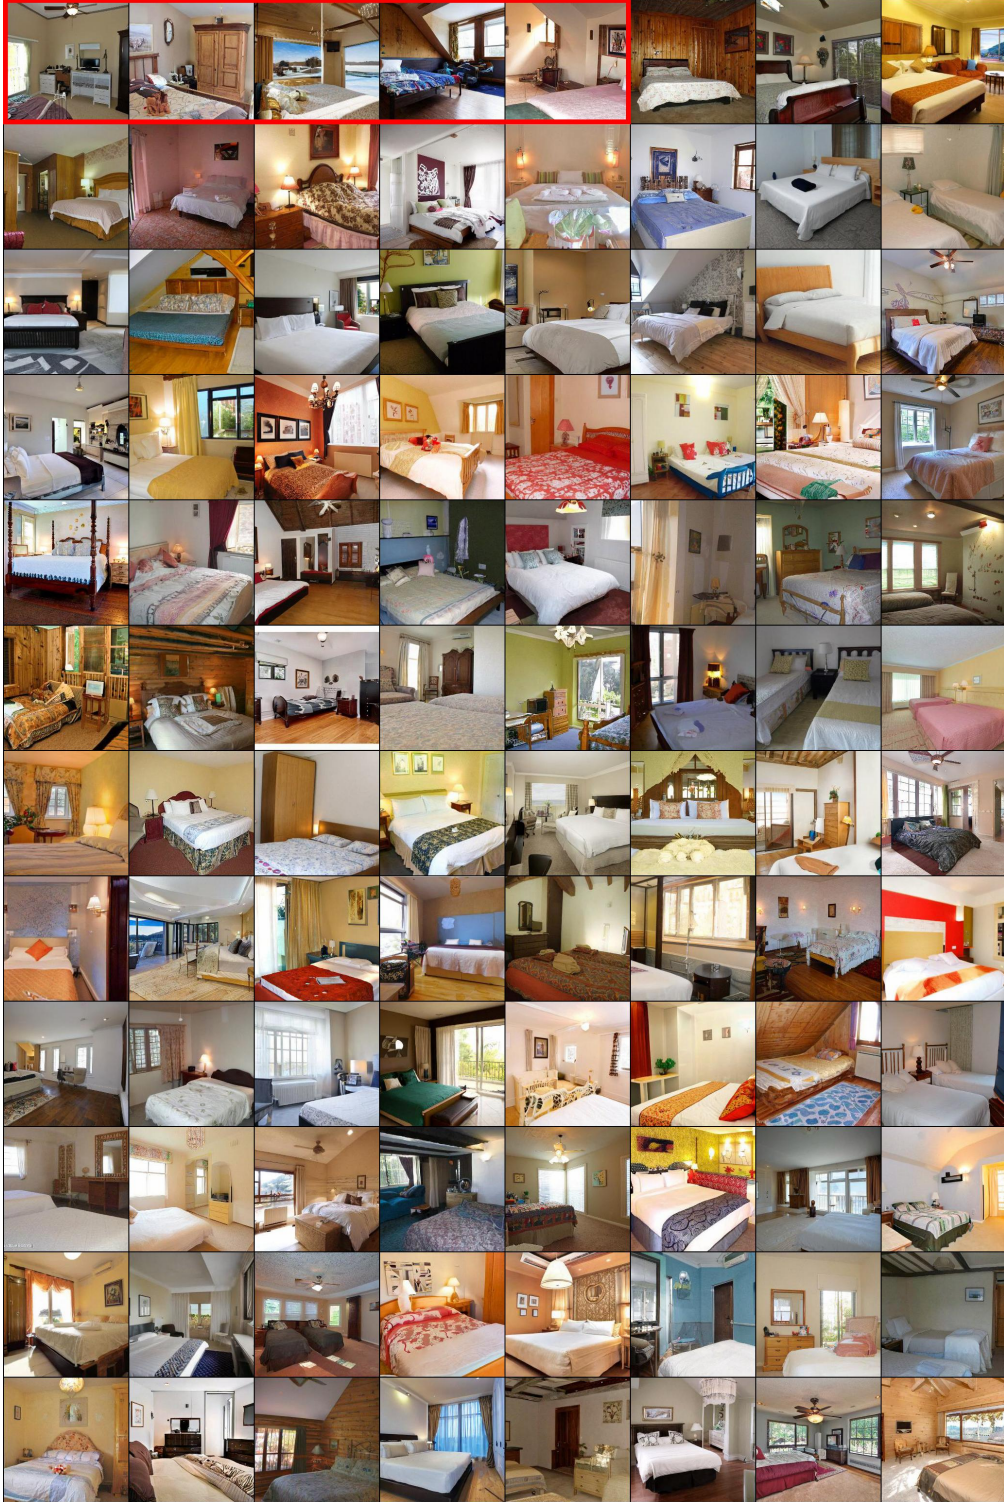

Figure 22: Fourth set (289–384) of images among the 500 non-curated censored generation samples with a reward model ensemble and without backward guidance and recurrence. Malign images are labeled with red borders and positioned at the beginning for visual clarity. Qualitatively and subjectively speaking, we observe that censoring makes the malign images less severely “broken” compared to the malign images of the uncensored generation.



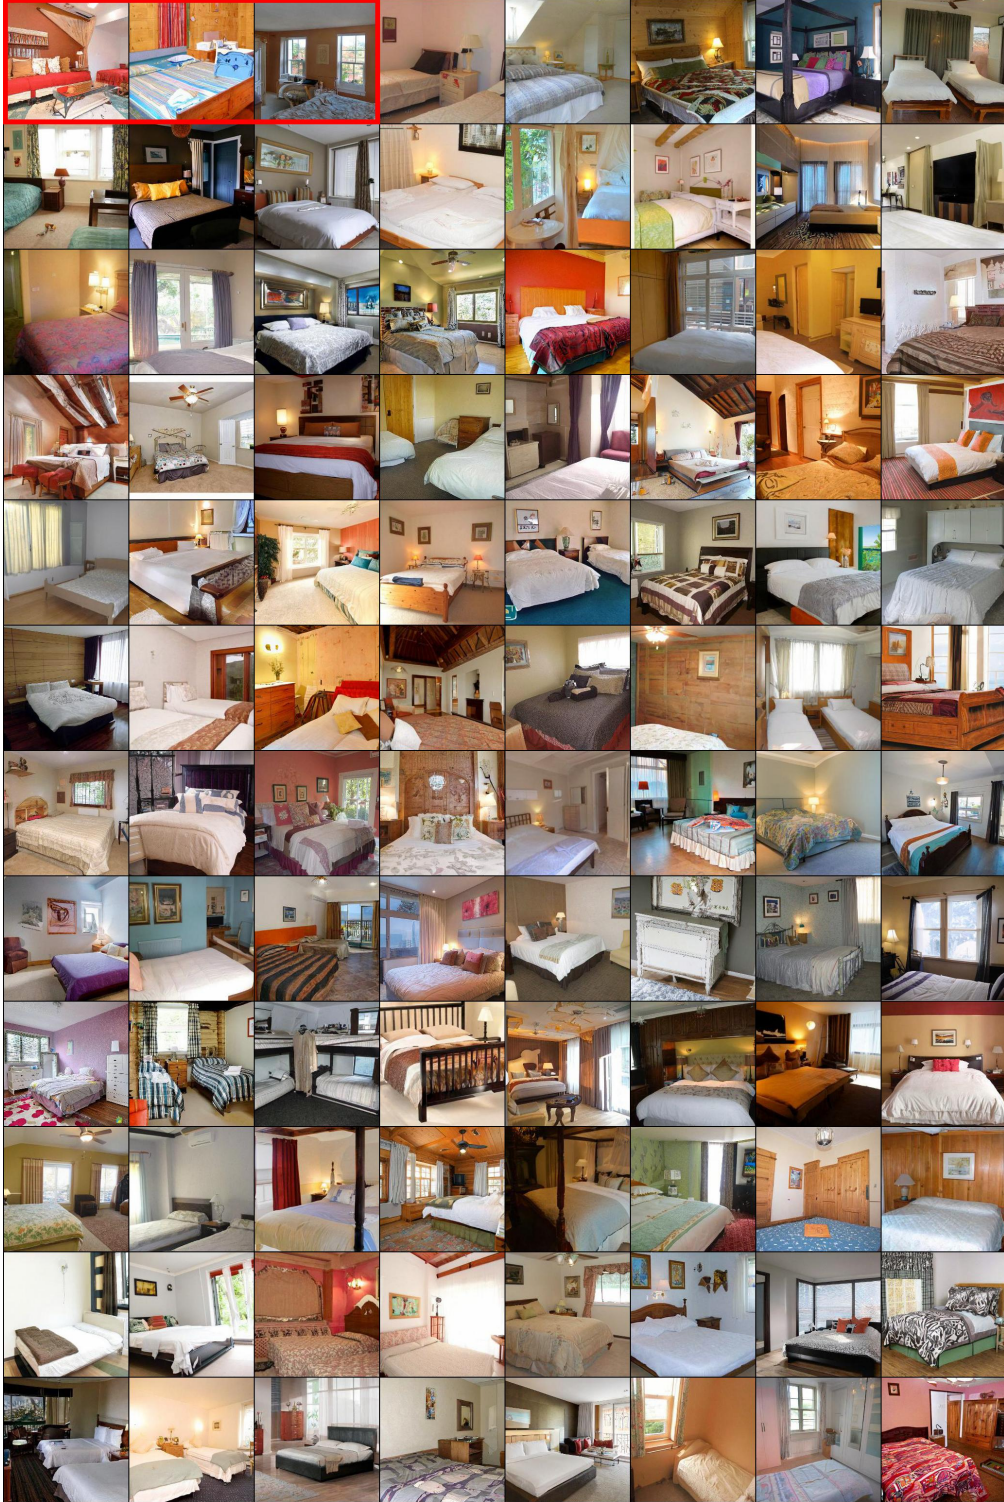

Figure 23: Fifth set (385–480) of images among the 500 non-curated censored generation samples with a reward model ensemble and without backward guidance and recurrence. Malign images are labeled with red borders and positioned at the beginning for visual clarity. Qualitatively and subjectively speaking, we observe that censoring makes the malign images less severely “broken” compared to the malign images of the uncensored generation.



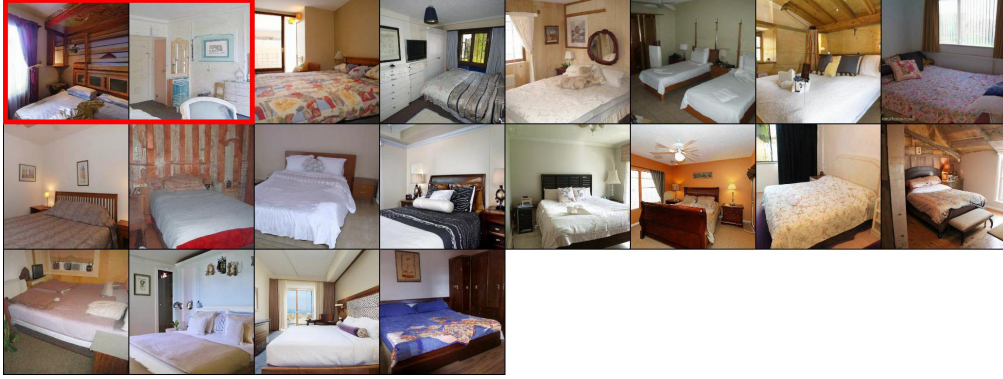

Figure 24: Sixth set (481–500) of images among the 500 non-curated censored generation samples with a reward model ensemble and without backward guidance and recurrence. Malign images are labeled with red borders and positioned at the beginning for visual clarity. Qualitatively and subjectively speaking, we observe that censoring makes the malign images less severely “broken” compared to the malign images of the uncensored generation.

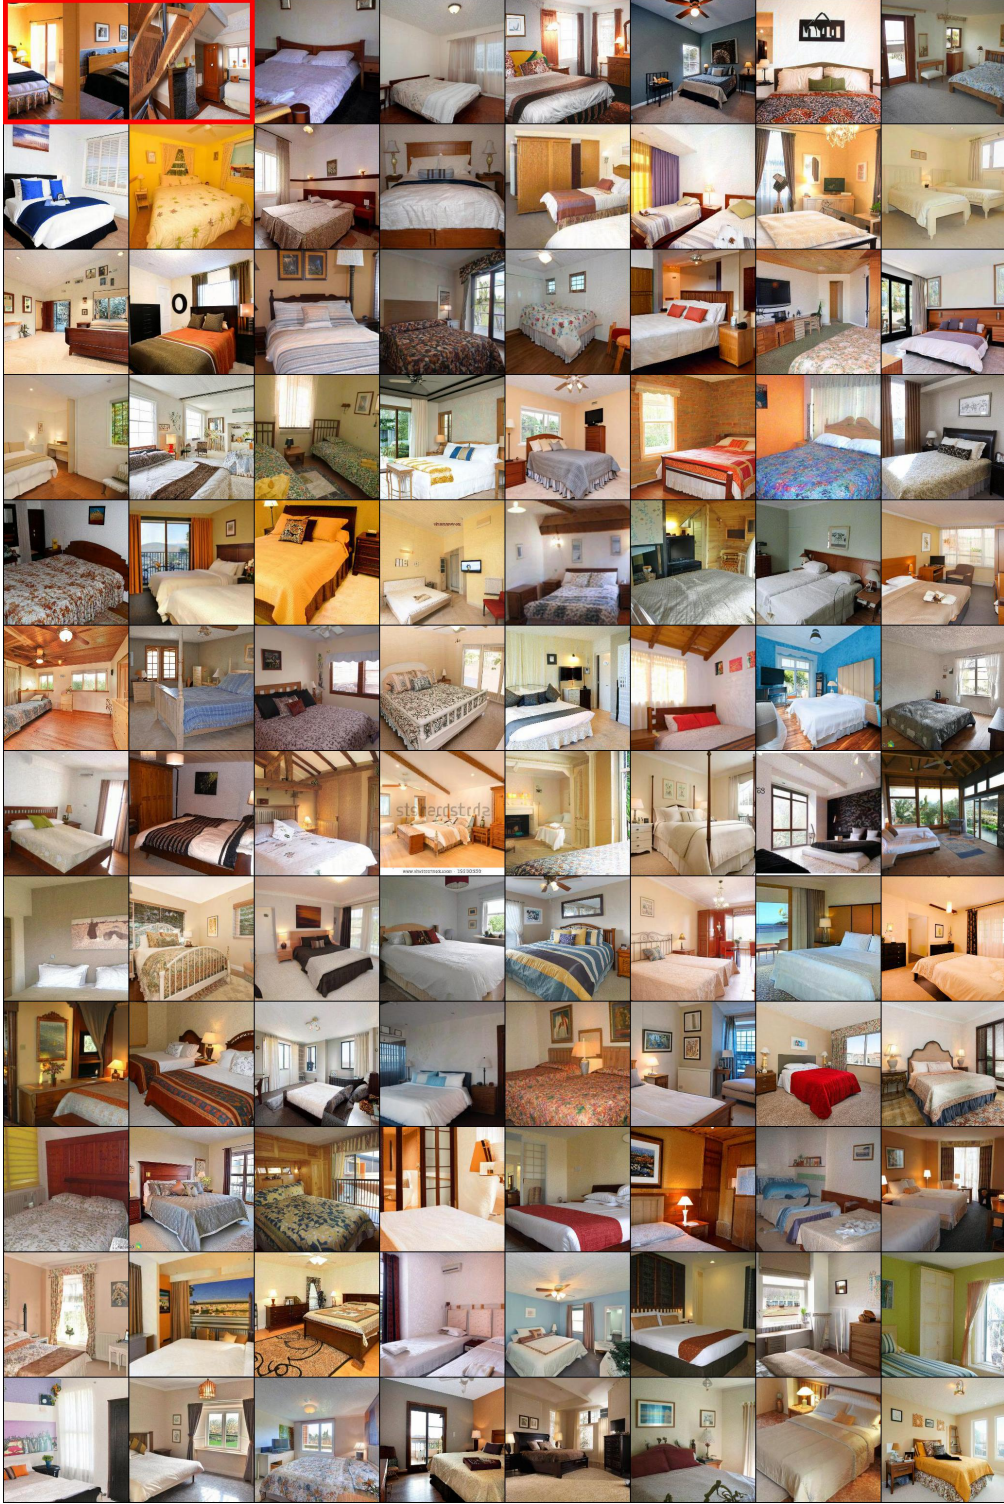

Figure 25: First set (1–96) of images among the 500 non-censored generation samples with a reward model ensemble and **with** backward guidance and recurrence. Malign images are labeled with red borders and positioned at the beginning for visual clarity. Qualitatively and subjectively speaking, we observe that censoring makes the malign images less severely “broken” compared to the malign images of the uncensored generation.



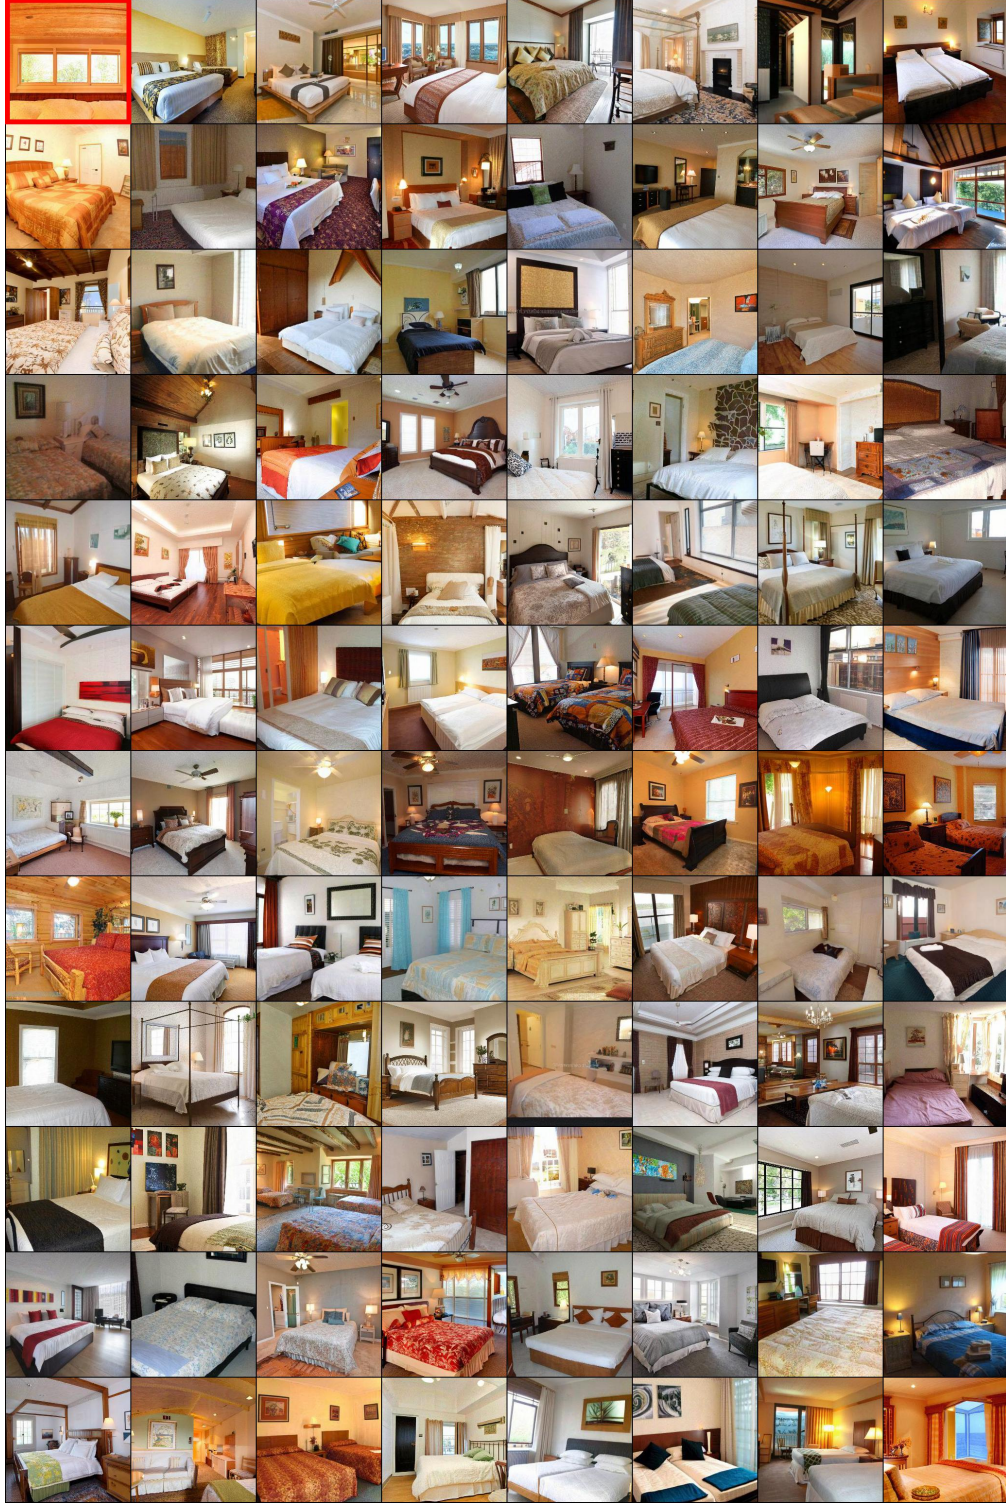

Figure 26: Second set (97–192) of images among the 500 non-censored generation samples with a reward model ensemble and **with** backward guidance and recurrence. Malign images are labeled with red borders and positioned at the beginning for visual clarity. Qualitatively and subjectively speaking, we observe that censoring makes the malign images less severely “broken” compared to the malign images of the uncensored generation.



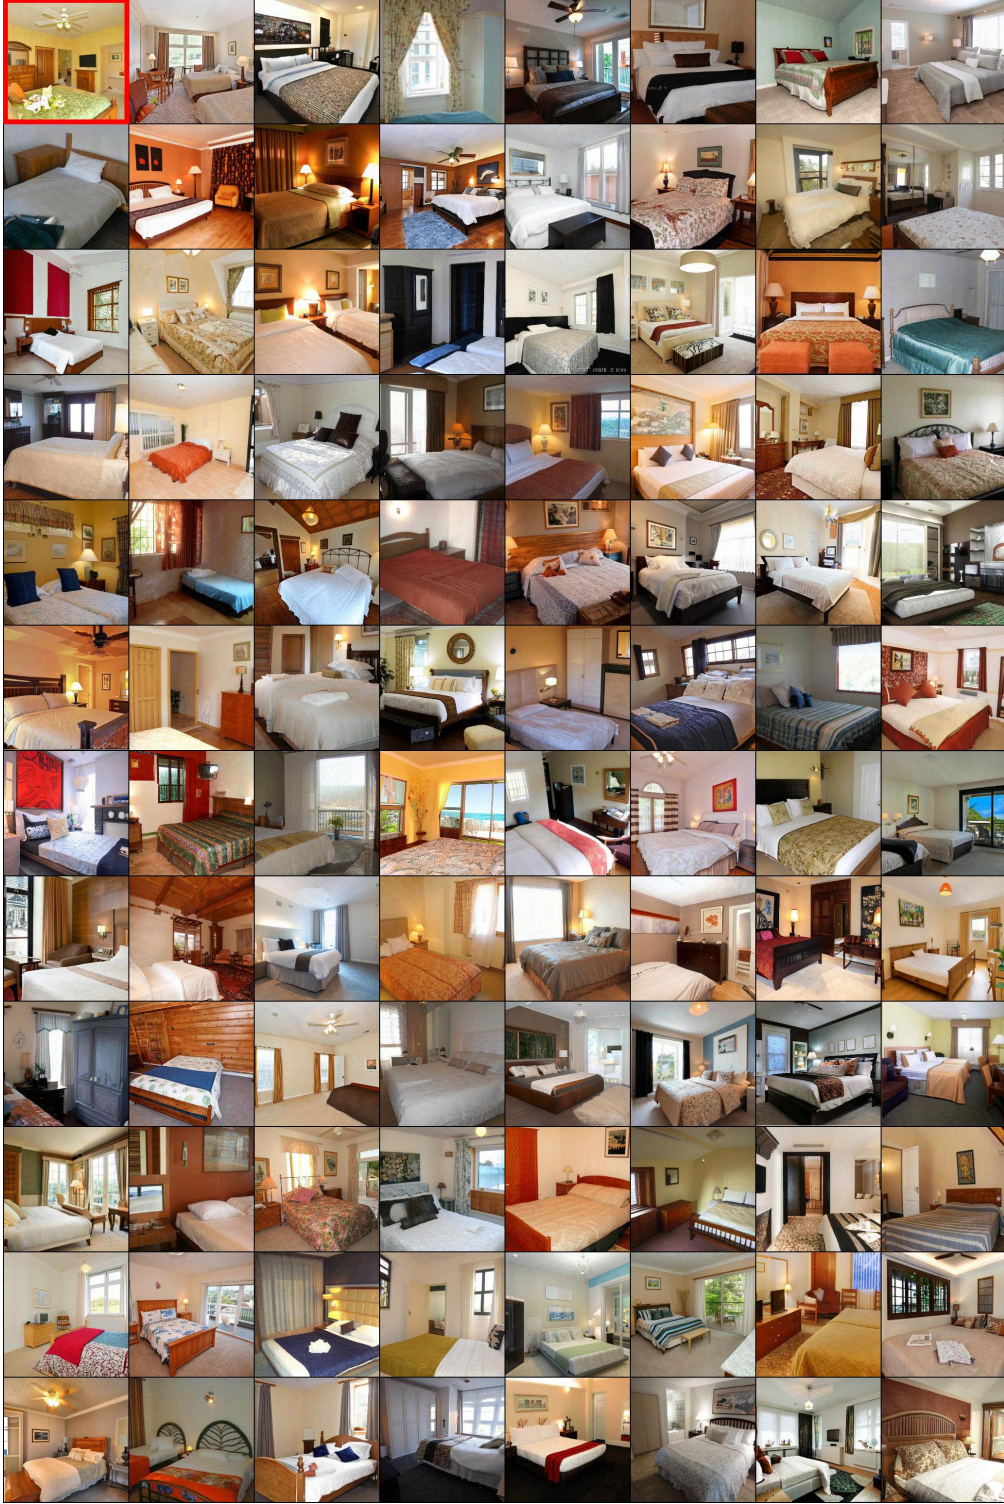

Figure 27: Third set (193–288) of images among the 500 non-curated censored generation samples with a reward model ensemble and **with** backward guidance and recurrence. Malign images are labeled with red borders and positioned at the beginning for visual clarity. Qualitatively and subjectively speaking, we observe that censoring makes the malign images less severely “broken” compared to the malign images of the uncensored generation.



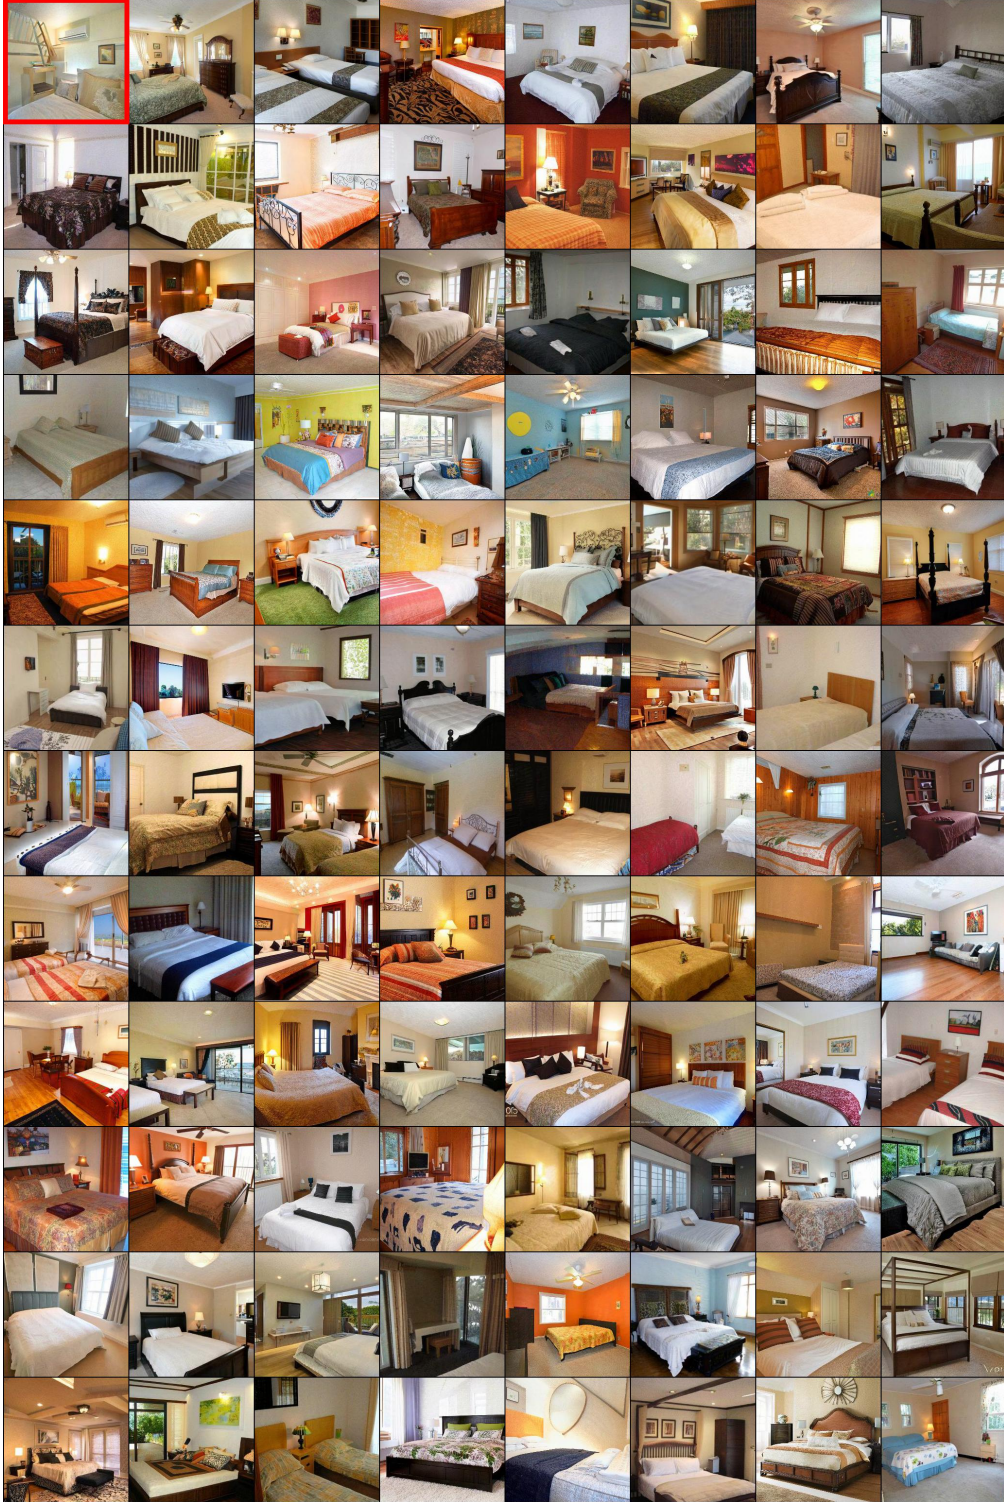

Figure 28: Fourth set (289–384) of images among the 500 non-curated censored generation samples with a reward model ensemble and **with** backward guidance and recurrence. Malign images are labeled with red borders and positioned at the beginning for visual clarity. Qualitatively and subjectively speaking, we observe that censoring makes the malign images less severely “broken” compared to the malign images of the uncensored generation.



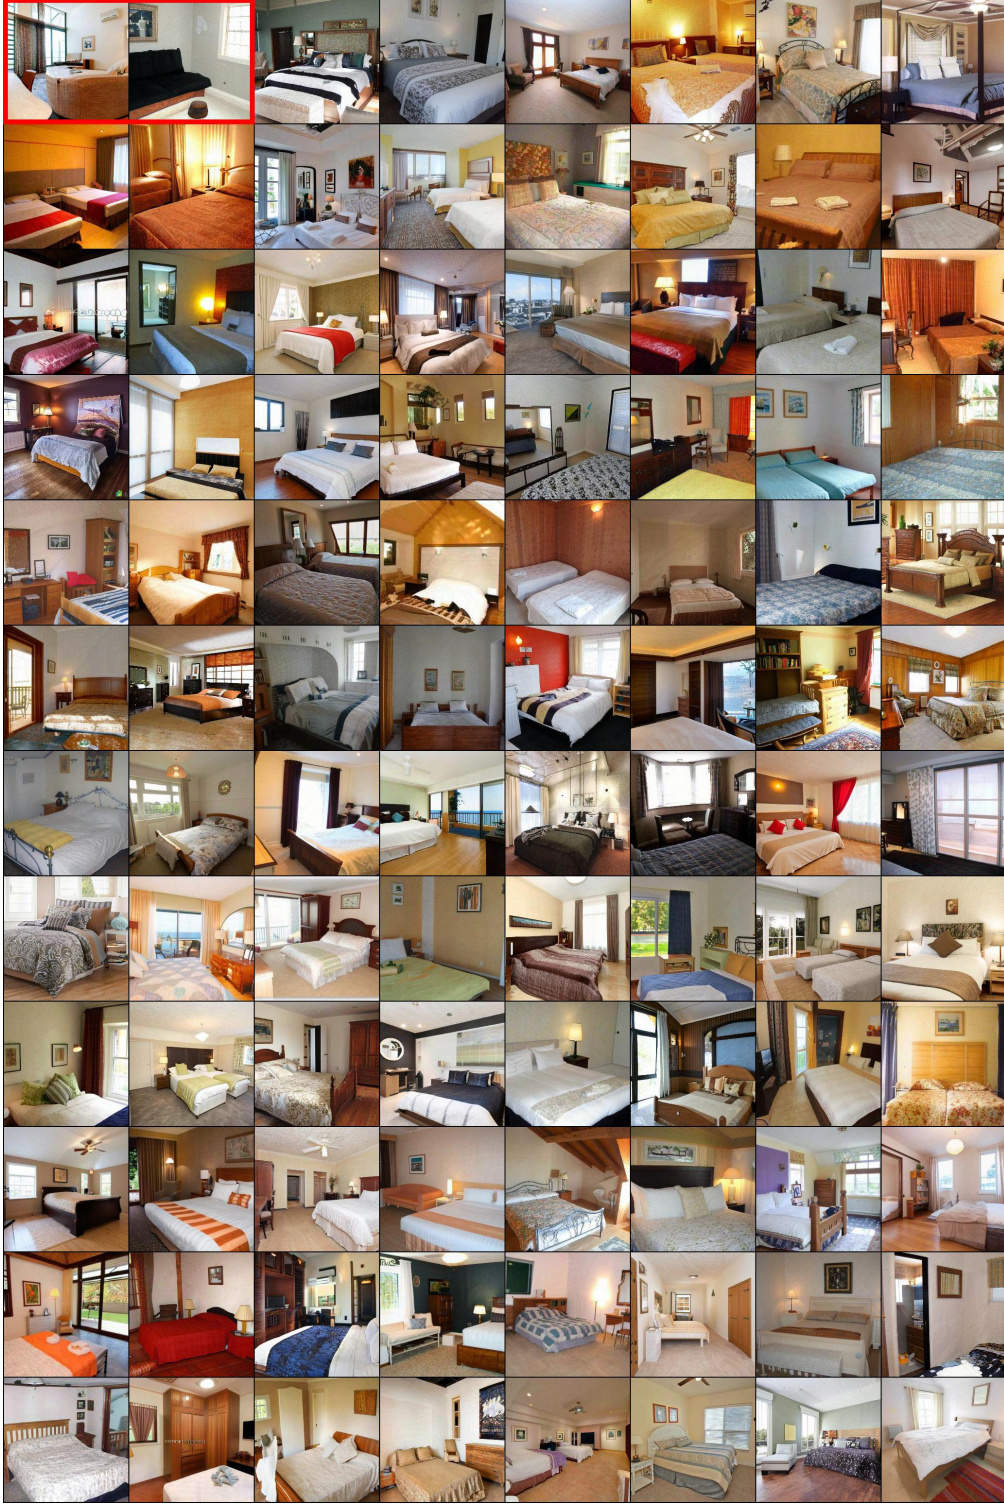

Figure 29: Fifth set (385–480) of images among the 500 non-curated censored generation samples with a reward model ensemble and **with** backward guidance and recurrence. Malign images are labeled with red borders and positioned at the beginning for visual clarity. Qualitatively and subjectively speaking, we observe that censoring makes the malign images less severely “broken” compared to the malign images of the uncensored generation.

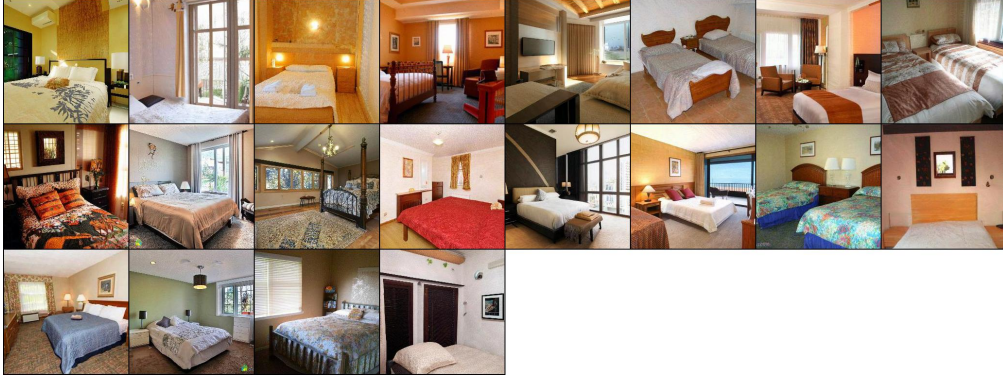

Figure 30: Sixth set (481–500) of images among the 500 non-curated censored generation samples with a reward model ensemble and **with** backward guidance and recurrence. Malign images are labeled with red borders and positioned at the beginning for visual clarity. Qualitatively and subjectively speaking, we observe that censoring makes the malign images less severely “broken” compared to the malign images of the uncensored generation.



## 633 L Transfer learning ablation

634 To evaluate the necessity of transfer learning in the LSUN bedroom setting of Section 5.4, we compare  
635 it with training the reward model from scratch. In this ablation study, we randomly initialize the  
636 weights of the reward model and train for 40,000 iterations with batch size 128. We use the training  
637 loss  $BCE_\alpha$  with  $\alpha = 0.1$  and a guidance weight of  $\omega = 10.0$ .

638 We observe that censoring fails without transfer learning, despite our best efforts to tune the parameters.  
639 The reward model is trained to interpolate the training data, but when we evaluate its performance  
640 on test data (which we create with additional human feedback), the classification accuracy is low:  
641 70.63% and 43.23% accuracy for malign and benign images. If we nevertheless proceed to perform  
642 censored generation, the malign proportion is  $15.68\% \pm 5.25\%$  when the proportion is measured  
643 with 500 images across 5 independent trials. This is no better than the 12.6% of the baseline model  
644 without censoring.
